# Supplementary material for: Synthesis of novel sugar-lactam conjugates using the Aubé reaction
Source: Royal Society of Chemistry journal article supplement (doi:10.1039/c0ob00719f), 2010-11-17

# A Convenient Synthesis of Novel Sugar-lactam Hybrids Using Aubé Reaction

Suresh E. Kurhade, Tanaji Mengawade, Debnath Bhuniya, Venkata P. Palle, and D. Srinivasa Reddy\*

## Corresponding author

Dr. D. Srinivasa Reddy  
Discovery Chemistry,  
Advinus Therapeutics Pvt. Ltd.,  
Quantum Towers, Plot No. 9,  
Rajiv Gandhi Infotech Park, Phase-I,  
Hinjewadi, Pune, 411057, India.  
Tel: 91 20 6653 9600  
Fax: 91 20 6653 9620  
E-mail: dsrinivas.reddy@advinus.com

## Supporting Information

---

|                                                      | Page |
|------------------------------------------------------|------|
| Experimental procedures                              | S-2  |
| References                                           | S-18 |
| Copies of $^1\text{H}$ & $^{13}\text{C}$ NMR spectra | S-19 |

---

## General:

All reagents, starting materials, and solvents (including dry solvents) were obtained from commercial suppliers and used as such without further purification. Reactions were carried out in oven-dried glassware under a positive pressure of argon unless otherwise mentioned. Column chromatography was performed on silica gel (Rankem, 100-200 mesh). Deuterated solvents (Cambridge Isotope Laboratories) for NMR spectroscopic analyses were used as received. All NMR spectra were recorded on Varion 400 MHz spectrometer. Coupling constants are measured in Hertz. All chemical shifts are quoted in ppm, relative to tetramethylsilane, using the residual solvent peak as a reference standard. Optical rotation was recorded from Rudolph autopol-V polarimeter at 589 nm (sodium D-line). Mass spectra were measured on a Agilent MSD/VL with ESI ionization. HRMS data was obtained from JEOL MS route 600H instrument. Infrared (IR) spectra were recorded on a Perkin-Elmer 100 FT-IR spectrometer.

## Experimental details:

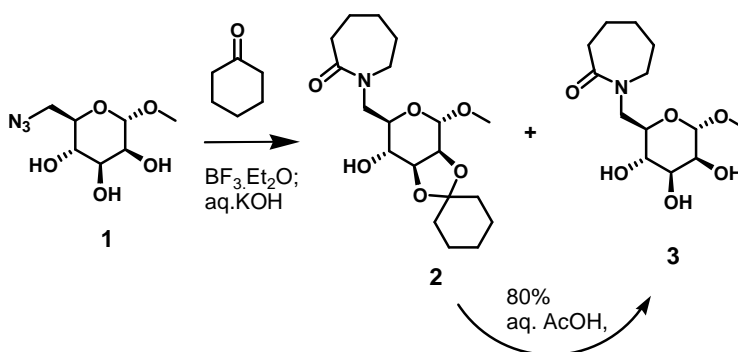

**Methyl 6-deoxy-6-N-azepan-2-one- $\alpha$ -D-mannopyranoside (3).** To the mixture of 6-Azido-6-deoxy-methyl- $\alpha$ -D-mannopyranoside **1**<sup>1</sup> (0.25g, 1.14 mmol) and cyclohexanone (0.18 mL, 3.50 mmol) in dichloromethane (5 mL),  $\text{BF}_3 \cdot \text{Et}_2\text{O}$  (0.57mL, 4.57 mmol) was added drop wise under argon atmosphere at 0 °C. Reaction mixture was allowed to warm up to room temperature and stirring continued for 24 hours. The reaction mixture was diluted with diethyl ether (5 mL) and 50% aq. KOH (1 mL) was added. After stirring for additional one hour, reaction mixture was evaporated to dryness and purified by column chromatography using 30% ethyl acetate: hexane to neat ethyl acetate to get **2** and **3** in 230 mg and 36 mg respectively. Compound **2**: Mp = 89-91°C;  $[\alpha]_D^{25} = -15.6^\circ$  (c 1,  $\text{CH}_3\text{OH}$ ); IR ( $\text{CHCl}_3$ ): 1071, 1099, 1623, 3368  $\text{cm}^{-1}$ ;  $^1\text{H}$  NMR

(CD<sub>3</sub>OD, 400 MHz)  $\delta$  1.34-1.79 (series of m, 15H), 2.51-2.61 (m, 2H), 3.33 (d,  $J = 3.6$  Hz, 1H), 3.36 (s, 3H), 3.49 (d,  $J = 2.4$  Hz, 1H), 3.52-3.55 (m, 1H), 3.58-3.64 (m, 2H), 3.85 (d,  $J = 4.80$  Hz, 1H), 3.88 (d,  $J = 4.80$  Hz, 1H), 4.00 (dd,  $J = 5.6, 7.6$  Hz, 1H), 4.09 (d,  $J = 5.6$  Hz, 1H), 4.87 (s, 1H); <sup>13</sup>C NMR (100.6 MHz, CD<sub>3</sub>OD)  $\delta$  179.9, 110.9, 99.6, 78.5, 76.5, 71.5, 70.6, 55.3, 53.1, 50.7, 39.2, 37.5, 36.4, 30.7, 28.7, 26.0, 25.0, 24.7, 24.5; LCMS = 370.2 (M+1); HRMS (ESI):  $m/z$  calculated for C<sub>19</sub>H<sub>31</sub>NO<sub>6</sub>Na [M + Na]<sup>+</sup> 392.2049, found 392.2096. Compound **3**:  $[\alpha]^{25}_D = +24.4^\circ$  (*c* 1, CH<sub>3</sub>OH); IR (CHCl<sub>3</sub>): 1610, 3392 cm<sup>-1</sup>; <sup>1</sup>H NMR (CD<sub>3</sub>OD, 400 MHz)  $\delta$  1.64-1.82 (m, 6H), 2.55-2.58 (m, 2H), 3.34 (s, 3H), 3.47 (t,  $J = 10$  Hz, 1H), 3.55-3.62 (m, 4H), 3.66 (dd,  $J = 3.6, 9.2$  Hz, 1H), 3.76-3.81 (m, 2H), 4.58 (d,  $J = 1.6$  Hz, 1H). <sup>13</sup>C NMR (100.6 MHz, CD<sub>3</sub>OD)  $\delta$  179.7, 102.9, 73.3, 71.8, 71.7, 69.6, 55.3, 53.1, 51.0, 37.6, 30.8, 28.7, 24.4; MS = 290 (M+1); HRMS (ESI):  $m/z$  calculated for C<sub>13</sub>H<sub>24</sub>NO<sub>6</sub> [M + H]<sup>+</sup> 290.1603, found 290.1586.

*Conversion of compound 2 to compound 3*: The compound **2** (230 mg) was dissolved in 80% aq. acetic acid (5 mL) and stirred at 80 °C. After 24 hours, the reaction mixture was evaporated to dryness to furnish the crude product. The crude compound was purified by column chromatography using silica gel and eluted with 50% ethyl acetate: hexane to neat ethyl acetate get 170 mg of titled product **3**. Overall yield: 205 mg. (64%).

Compounds **4-11** are prepared using the analogous procedure described for the synthesis of **3**.

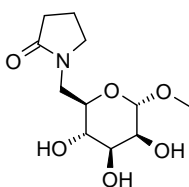

**4**

**Methyl 6-deoxy-6-N-pyrrolidine-2-one- $\alpha$ -D-mannopyranoside (4)**. Yield 66%.  $[\alpha]^{24.8}_D = +28.9^\circ$  (*c* 1, CH<sub>3</sub>OH); IR (CHCl<sub>3</sub>): 1054, 1656, 3392 cm<sup>-1</sup>; <sup>1</sup>H NMR (CD<sub>3</sub>OD, 400 MHz)  $\delta$  2.02-2.09 (m, 2H), 2.37-2.41 (m, 2H), 3.33 (s, 3H), 3.45 (t,  $J = 9.2$  Hz, 1H), 3.56-3.68 (m, 6H), 3.75 (dd,  $J = 1.2$  Hz,  $J = 3.2$  Hz, 1H), 4.58 (s, 1H); <sup>13</sup>C NMR (100.6 MHz, CD<sub>3</sub>OD)  $\delta$  178.3, 102.8, 72.6, 71.9, 71.8, 69.8, 55.2, 50.8, 45.2, 31.8, 19.2; LCMS = 262 (M+1); HRMS (ESI):  $m/z$  calculated for C<sub>11</sub>H<sub>19</sub>NO<sub>6</sub>Na [M + Na]<sup>+</sup> 284.1110, found 284.1101.

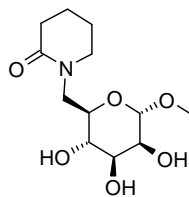

5

**Methyl 6-deoxy-6-N-piperidine-2-one- $\alpha$ -D-mannopyranoside (5).** Yield 64%;  $[\alpha]^{23.9}_D = +50.9^\circ$  (*c* 1, CH<sub>3</sub>OH); IR (CHCl<sub>3</sub>): 1054, 1602, 3411 cm<sup>-1</sup>; <sup>1</sup>H NMR (CD<sub>3</sub>OD, 400 MHz)  $\delta$  1.77-1.86 (m, 4H), 2.34-2.40 (m, 2H), 3.31 (s, 3H), 3.46 (t, *J* = 9.60 Hz, 1H), 3.52-3.57 (m, 2H), 3.63 (d, *J* = 3.2 Hz, 1H), 3.65-3.70 (m, 3H), 3.77 (dd, *J* = 1.6, 3.2 Hz, 1H), 4.58 (d, *J* = 1.6 Hz, 1H); <sup>13</sup>C NMR (100.6 MHz, CD<sub>3</sub>OD)  $\delta$  173.3, 102.8, 72.8, 71.9, 71.8, 70.0, 55.1, 51.6, 49.9, 32.8, 24.0, 21.9; LCMS = 276(M+1); HRMS (ESI): *m/z* calculated for C<sub>12</sub>H<sub>21</sub>NO<sub>6</sub>Na [M + Na]<sup>+</sup> 298.1266, found 298.1253.

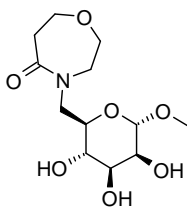

6

**Methyl 6-deoxy-6-N-[1,4]oxazepan-5-one- $\alpha$ -D-mannopyranoside (6).** Yield 52%;  $[\alpha]^{25}_D = +21.4^\circ$  (*c* 1, CH<sub>3</sub>OH); IR (CHCl<sub>3</sub>): 1491, 1619, 3392 cm<sup>-1</sup>; <sup>1</sup>H NMR (CD<sub>3</sub>OD, 400 MHz)  $\delta$  2.70-2.88 (m, 2H), 3.34 (s, 3H), 3.51 (t, *J* = 9.60 Hz, 1H), 3.59-3.90 (series of m, 11H), 4.59 (d, *J* = 1.60 Hz, 1H); <sup>13</sup>C NMR (100.6 MHz, CD<sub>3</sub>OD)  $\delta$  178.0, 102.9, 73.3, 71.7, 71.5, 70.9, 69.5, 65.9, 55.4, 55.1, 51.0, 41.7; LCMS = 292.0 (M+1); HRMS (ESI): *m/z* calculated for C<sub>12</sub>H<sub>21</sub>NO<sub>7</sub>Na [M+Na]<sup>+</sup> 314.1215, found 314.1264.

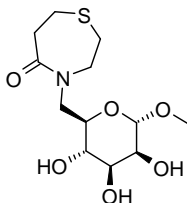

7

**Methyl 6-deoxy-6-*N*-[1,4]thiazepan-5-one- $\alpha$ -D-mannopyranoside (7).** Yield 57%;  $[\alpha]^{23.7}_D = +18.8^\circ$  (*c* 0.5, CH<sub>3</sub>OH); IR (CHCl<sub>3</sub>): 1425, 1623, 3369.0 cm<sup>-1</sup>; <sup>1</sup>H NMR (CD<sub>3</sub>OD, 400 MHz)  $\delta$  2.66-2.80 (m, 4H), 2.90-2.97 (m, 2H), 2.99 (t, *J* = 5.6 Hz, 1H), 3.34 (s, 3H), 3.34-3.50 (m, 2H), 3.58-3.68 (m, 2H), 3.77-3.84 (m, 1H), 3.91-3.95 (m, 2H), 4.60 (s, 1H); <sup>13</sup>C NMR (100.6 MHz, CD<sub>3</sub>OD)  $\delta$  177.9, 103.0, 73.3, 71.8, 71.7, 69.6, 55.3, 55.1, 51.1, 41.2, 29.8, 24.6; LCMS = 308(M+1); HRMS (ESI) : *m/z* calculated for C<sub>12</sub>H<sub>22</sub>NO<sub>6</sub>S [M + H]<sup>+</sup> 308.1167, found 308.1182.

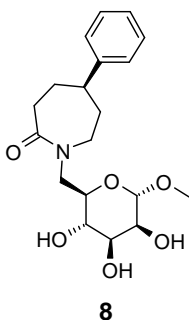

**Methyl 6-deoxy-6-*N*-(5*R*)-phenyl-azepan-2-one- $\alpha$ -D-mannopyranoside (8).** Yield 40%; Mp = 63-65°C (fused);  $[\alpha]^{22.2}_D = 4.84^\circ$  (*c* 0.5, CH<sub>3</sub>OH); IR (CHCl<sub>3</sub>): 1619, 3412 cm<sup>-1</sup>; <sup>1</sup>H NMR(CD<sub>3</sub>OD, 400 MHz)  $\delta$  1.70 (q, *J* = 12.8, 1H), 1.83-1.90 (m, 1H), 1.94-2.00 (m, 1H), 2.25 (q, *J* = 12.8 Hz, 1H), 2.55 (dd, *J* = 7.2, 13.6 Hz, 1H), 2.77-2.89 (m, 2H), 3.34 (s, 3H), 3.45 (d, *J* = 14.4 Hz, 1H), 3.53-3.61 (m, 3H), 3.70-3.71 (m, 1H), 3.81-3.82 (m, 1H), 3.84 (d, *J* = 4.0 Hz, 1H), 4.08 (dd, *J* = 11.2, 3.76 Hz, 1H), 4.61 (s, 1H), 7.12-7.26 (m, 5H); <sup>13</sup>C NMR (100.6 MHz, CD<sub>3</sub>OD)  $\delta$  179.4, 147.9, 129.4 (2C), 128.0 (2C), 127.2, 103.0, 74.0, 71.8, 71.5, 69.1, 55.2, 52.7, 50.8, 49.5, 37.0, 35.9, 32.4; LCMS = 366.1 (M+1); HRMS (ESI): *m/z* calculated for C<sub>19</sub>H<sub>27</sub>NO<sub>6</sub> Na [M + Na]<sup>+</sup> 388.1736, found 388.1739.

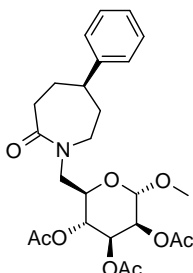

**Methyl 6-deoxy-2,3,4-tri-*O*-acetyl-6-*N*-(5*R*)-phenyl-azepan-2-one- $\alpha$ -D-mannopyranoside.**

To the mixture of **(8)** (0.3g, 0.82 mmol), and pyridine (0.7 mL, 6.57 mmol) in dichloromethane

(5 mL), Ac<sub>2</sub>O (0.53mL, 6.57 mmol) and DMAP (5 mg, 0.041 mmol) was added at room temperature. Reaction mixture was stirred for 16 hours. The reaction mixture was diluted with ice water (20 mL) followed by extraction using dichloromethane (3X20 mL), combined organic layer was washed with 1N HCl (2X10mL), brine (20 mL) and dried over sodium sulfate. The solvent was evaporated under reduced pressures to yield the crude product which was purified by column chromatography followed by crystallization in hot ethanol (10 mL) to furnish the title compound (160 mg); Yield 40% (after recrystallization); Mp = 192-194°C;  $[\alpha]^{22.8}_D = 64.9^\circ$  (*c* 1, CH<sub>3</sub>OH); IR (CHCl<sub>3</sub>): 1084, 1135, 1222, 1648, 1753 cm<sup>-1</sup>; <sup>1</sup>H NMR (CDCl<sub>3</sub>, 400 MHz) δ 1.75-1.93 (m, 3H), 1.94 (s, 3H), 1.99 (s, 3H), 2.01-2.08 (m, 1H), 2.11 (s, 3H), 2.62-2.68 (m, 2H), 2.72-2.82 (m, 1H), 3.35 (s, 3H), 3.59-3.72 (m, 4H), 3.96-4.10 (m, 1H), 4.62 (s, 1H), 5.16-5.21 (m, 2H), 5.28-5.31 (m, 1H), 7.19-7.25 (m, 3H), 7.27-7.32 (m, 2H); <sup>13</sup>C NMR (100.6 MHz, CDCl<sub>3</sub>) δ 175.9, 170.6, 170.2, 170.1, 146.5, 128.9 (2C), 127.0 (2C), 126.8, 98.8, 71.1, 70.0, 69.5, 67.2, 55.3, 50.6, 48.6, 48.5, 26.9, 36.8, 30.3, 21.1, 20.9, 20.9. LCMS = 492.3 (M+1).

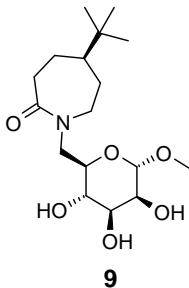

**Methyl 6-deoxy-6-N-(5R)-tert-butylazepan-2-one-α-D-mannopyranoside (9).** Yield 52%; Mp = 159-161°C;  $[\alpha]^{22.6}_D = 26.2^\circ$  (*c* 0.5, CH<sub>3</sub>OH); IR (CHCl<sub>3</sub>): 1457.7, 1618.6, 3392 cm<sup>-1</sup>; <sup>1</sup>H NMR (CD<sub>3</sub>OD, 400 MHz) δ 0.89 (s, 9H), 1.21-1.33 (m, 3H), 1.55 (m, 2H), 1.80-1.96 (m, 1H), 2.00-2.06 (m, 1H), 2.49 (dd, *J* = 7.2, 13.2 Hz, 1H), 2.61 (t, *J* = 12 Hz, 1H), 3.33 (s, 3H), 3.47-3.68 (m, 4H), 3.76-3.78 (m, 1H), 3.89 (dd, *J* = 4.8, 14.4 Hz, 1H), 4.60 (d, *J* = 1.2 Hz, 1H); <sup>13</sup>C NMR (100.6 MHz, CD<sub>3</sub>OD) δ 179.7, 103.0, 73.7, 71.8, 71.6, 69.3, 55.2, 52.8, 52.7, 50.7, 36.8, 33.8, 29.9, 28.0 (3-C), 25.3; LCMS = 346 (M+1); HRMS (ESI) : *m/z* calculated for C<sub>17</sub>H<sub>32</sub>NO<sub>6</sub> [M+H]<sup>+</sup> 346.2229, found 346.2201.

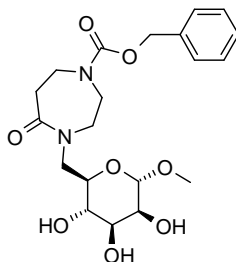

10

**Methyl 6-deoxy-6-N-[1,4]diazepane-1-carboxylic acid benzyl ester azepan-5-one- $\alpha$ -D-mannopyranoside (10).** Yield 40%;  $[\alpha]^{23.6}_D = +25.6^\circ$  (*c* 1, CH<sub>3</sub>OH); IR (CHCl<sub>3</sub>): 1241, 1431, 1626, 1697, 3392 cm<sup>-1</sup>; <sup>1</sup>H NMR (CD<sub>3</sub>OD, 400 MHz)  $\delta$  2.69-2.73 (m, 2H), 3.32 (s, 3H), 3.34-3.35 (m, 1H), 3.44-3.54 (m, 2H), 3.58-3.69 (m, 5H), 3.76 (dd, *J* = 2.0, 3.6 Hz, 1H), 3.80-3.87 (m, 3H), 4.59 (s, 1H), 5.13 (s, 2H), 7.30-7.35 (m, 5H); <sup>13</sup>C NMR (100.6 MHz, CD<sub>3</sub>OD)  $\delta$  177.5, 157.0, 137.9, 129.5 (2C), 129.2, 129.0 (2C), 102.9, 73.3, 71.7, 71.5, 69.4, 68.6, 55.3, 53.5, 51.1, 47.8, 42.6, 39.5; LCMS = 425 (M+1); HRMS (ESI) : *m/z* calculated for C<sub>20</sub>H<sub>29</sub>N<sub>2</sub>O<sub>8</sub> [M + H]<sup>+</sup> 425.1924, found 425.1909.

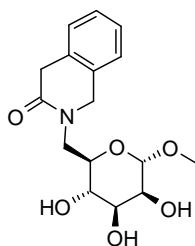

11

**Methyl-6-deoxy-6-N-1,4-dihydro-2H-isoquinolin-3-one- $\alpha$ -D-mannopyranoside (11).** Yield = 10%;  $[\alpha]^{23.3}_D = +37.5^\circ$  (*c* 1, CH<sub>3</sub>OH); IR (CHCl<sub>3</sub>): 1377, 1668, 3392 cm<sup>-1</sup>; <sup>1</sup>H NMR (CD<sub>3</sub>OD, 400 MHz)  $\delta$  3.08 (s, 3H), 3.46-3.50 (m, 1H), 3.55-3.75(m, 5H), 3.97 (d, *J* = 12 Hz, 1H), 4.55 (d, *J* = 1.2 Hz, 1H), 4.71 (d, *J* = 5.6 Hz, 2H), 7.18-7.25 (m, 5H); <sup>13</sup>C NMR (100.6 MHz, CD<sub>3</sub>OD)  $\delta$  172.8, 133.9, 133.4, 128.5, 127.9, 127.7, 126.2, 102.7, 72.9, 72.0, 71.9, 70.1, 55.0, 54.1, 38.5, 30.7; LCMS = 324 (M+1).

Compounds **20**, **21**, **22**, **23**, **25** and **26** are prepared using the analogous procedure (1<sup>st</sup> step) described for the synthesis of **3**.

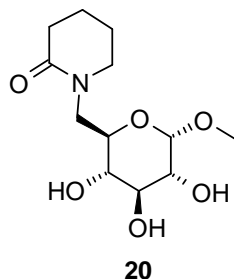

**Methyl 6-deoxy-6-N-piperidine-2-one- $\alpha$ -D-glucopyranoside (20).**

Yield 66%; Mp = 197-199°C;  $[\alpha]^{24.8}_D = +69.6^\circ$  (*c* 1, CH<sub>3</sub>OH); IR (CHCl<sub>3</sub>): 1048, 1602, 3338 cm<sup>-1</sup>; <sup>1</sup>H NMR (DMSO-d<sub>6</sub>, 400 MHz)  $\delta$  1.64-1.72 (m, 4H), 1.98- 2.60 (m, 3H), 2.88 (ddd, *J* = 4.4, 9.6, 5.5 Hz, 1H), 3.12- 3.20 (m, 3H), 3.21 (s, 3H), 3.92-3.42 (m, 1H), 3.52-3.57 (m, 1H), 3.71 (dd, *J* = 1.6, 14.0 Hz, 1H), 4.50 (d, *J* = 4.0 Hz, 1H), 4.75 (br s, 1H), 4.82 (br s, 1H), 5.01 (d, *J* = 4.4 Hz, 1H); <sup>13</sup>C NMR (100.6 MHz, DMSO-d-6)  $\delta$  168.9, 99.6, 72.7, 72.2, 71.8, 70.1, 54.1, 49.3, 48.1, 31.8, 22.8, 20.8; LCMS = 276.1 (M+1); HRMS (ESI) : *m/z* calculated for C<sub>12</sub>H<sub>22</sub>NO<sub>6</sub> [M+H]<sup>+</sup> 276.1447, found 276.1434.

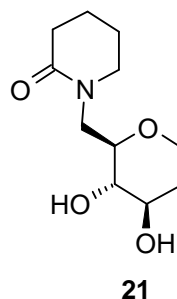

**1-((2R,3S,4R)-3, 4-Dihydroxy-tetrahydro-pyran-2-ylmethyl)-piperidin-2-one (21).**

Yield 65%;  $[\alpha]^{23.7}_D = -16.78^\circ$  (*c* 1, CH<sub>3</sub>OH); IR (CHCl<sub>3</sub>): 1089, 1608, 3365 cm<sup>-1</sup>; <sup>1</sup>H NMR (CD<sub>3</sub>OD, 400 MHz)  $\delta$  1.50-1.61 (m, 1H), 1.79 (t, *J* = 2.8 Hz, 4H), 1.87 (dd, *J* = 5.6, 13.2 Hz, 1H), 2.34-2.42 (m, 2H), 2.96 (t, *J* = 7.2, 1H), 3.24-3.43 (m, 3H), 3.50-3.55 (m, 3H), 3.78 (dd, *J* = 8.4, 14.8 Hz, 1H), 3.84-3.90 (m, 1H); <sup>13</sup>C NMR (100.6 MHz, CD<sub>3</sub>OD)  $\delta$  173.6, 81.1, 74.9, 73.0, 66.8, 51.4, 50.0, 35.0, 32.7, 23.9, 21.9; LCMS = 230.3 (M+1); HRMS (ESI): *m/z* calculated for C<sub>11</sub>H<sub>20</sub>NO<sub>4</sub>[M + H]<sup>+</sup> 230.1392, found 230.1390.



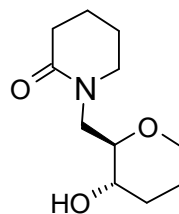

22

**1-((2R,3S)-3-Hydroxy-tetrahydro-pyran-2-ylmethyl)-piperidin-2-one (22).** Yield 60%;  $[\alpha]^{24.2}_D = -35.8^\circ$  (*c* 1, CH<sub>3</sub>OH); IR (CHCl<sub>3</sub>): 1092, 1617, 3369 cm<sup>-1</sup>; <sup>1</sup>H NMR (CDCl<sub>3</sub>, 400 MHz)  $\delta$  1.38-1.50 (m, 2H), 1.56-1.68 (m, 2H), 1.74-1.84 (m, 4H), 2.06-2.12 (m, 1H), 2.42-2.48 (m, 2H), 2.90 (d, *J* = 14.4 Hz, 1H), 3.12-3.31 (m, 3H), 3.64-3.72 (m, 1H), 3.84-3.86 (m, 1H), 4.43 (d, *J* = 14.4 Hz, 1H), 5.20 (br s, 1H); <sup>13</sup>C NMR (100.6 MHz, CDCl<sub>3</sub>)  $\delta$  172.3, 83.8, 68.5, 66.4, 51.2, 49.2, 32.1, 31.1, 26.0, 23.4, 21.4; LCMS = 214.2 (M+1); HRMS (ESI): *m/z* calculated for C<sub>11</sub>H<sub>20</sub>NO<sub>3</sub> [M + H]<sup>+</sup> 214.1443, found 214.1456.

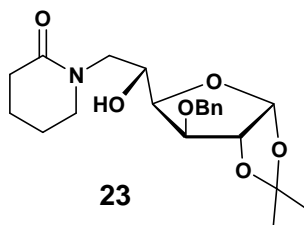

23

**6-N-(piperidine-2-one)-3-O-benzyl-6-deoxy-1, 2-O-isopropylidene- $\alpha$ -D-glucofuranoside (23).**

To minimize side product (VI) only 3 equivalents of BF<sub>3</sub>·Et<sub>2</sub>O was used. Yield 52%;  $[\alpha]^{24.6}_D = -2.16^\circ$  (*c* 1, CH<sub>3</sub>OH); IR (CHCl<sub>3</sub>): 1074, 1614, 3287 cm<sup>-1</sup>; <sup>1</sup>H NMR (CD<sub>3</sub>OD, 400 MHz)  $\delta$  1.29 (s, 3H), 1.44 (s, 3H), 1.76-1.84 (m, 4H), 2.36 (t, *J* = 8.0 Hz, 2H), 3.31-3.38 (m, 3H), 3.49-3.53 (m, 1H), 3.80 (dd, *J* = 3.2, 14.4 Hz, 1H), 3.96 (dd, *J* = 2.8, 8.8 Hz, 1H), 4.03 (d, *J* = 3.2 Hz, 1H), 4.18 (ddd, *J* = 3.2, 8.8, 12.0 Hz, 1H), 4.60-4.69 (m, 2H), 5.86 (d, *J* = 3.2 Hz, 1H), 7.27-7.38 (m, 5H); <sup>13</sup>C NMR (100.6 MHz, CD<sub>3</sub>OD)  $\delta$  174.1, 139.3, 129.3 (2C), 129.0 (2C), 128.8, 112.7, 106.6, 83.3, 83.0, 82.7, 73.3, 68.0, 53.7, 51.3, 32.8, 27.1, 26.4, 24.0, 21.8; LCMS = 392.3 (M+1); HRMS (ESI): *m/z* calculated for C<sub>21</sub>H<sub>30</sub>NO<sub>6</sub> [M+H]<sup>+</sup> 392.2073, found 392.2043.

Along with **23**, other compound **VI** (13%) was also isolated and the tentative structure is shown below. Tentative structure assigned as drawn below for the minor product based on following spectral data.

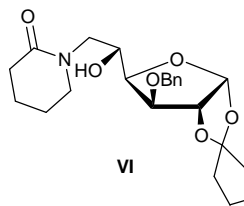

Yield 13%; IR (CHCl<sub>3</sub>): 1078, 1615, 3306 cm<sup>-1</sup>; <sup>1</sup>H NMR (CD<sub>3</sub>OD, 400 MHz) δ 0.82-0.94 (m, 4H), 1.69-1.94 (m, 5H), 2.18-2.24 (m, 1H), 2.40-2.44 (m, 2H), 3.01-3.04 (m, 1H), 3.32-3.35 (m, 1H), 3.48-3.57 (m, 3H), 3.78 (dd, *J* = 1.2, 14.4 Hz, 1H), 4.02 (dd, *J* = 2.8, 9.2 Hz, 1H), 4.10-4.1.5 (m, 2H), 4.68 (q, *J* = 15.2 Hz, 2H), 5.34 (br s, 1H), 5.85 (d, *J* = 3.6 Hz, 1H), 7.26- 7.38 (m, 5H); <sup>13</sup>C NMR(100.6 MHz, CD<sub>3</sub>OD) δ 173.9, 138.2, 128.7 (2C), 128.1 (2C), 128.0, 121.7, 105.2, 83.2, 82.0, 81.1, 73.1, 69.0, 54.1, 50.9, 37.4, 36.8, 32.3, 23.8, 23.4, 23.2, 21.2; LCMS = 418.0 (M+1).

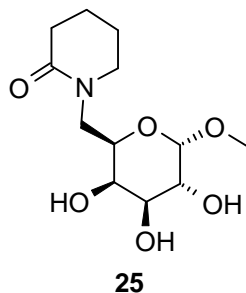

**Methyl 6-deoxy-6-*N*-piperidine-2-one- $\alpha$ -D-galctopyranoside (25).**

The compound **25** was synthesized by following the analogous procedure described for the synthesis of **20**, However, during hydrolysis (2<sup>nd</sup> step) excess of aq. 50% KOH (for 180 mg reaction 1.5 mL) was used and stirred for 6 hours. Yield 51%; [ $\alpha$ ]<sup>24.4</sup><sub>D</sub> = +2.68° (*c* 1, CH<sub>3</sub>OH); IR (CHCl<sub>3</sub>): 1048, 1216, 1618, 3620 cm<sup>-1</sup>; <sup>1</sup>H NMR (CD<sub>3</sub>OD, 400 MHz) δ 1.78-1.84 (m, 4H), 2.35 (t, *J* = 6.0 Hz, 2H), 3.20 (dd, *J* = 8.8, 13.6 Hz, 1H), 3.34 (s, 3H), 3.36-3.44 (m, 1H), 3.56-3.64 (m, 1H), 3.67-3.77 (m, 3H), 3.85 (dd, *J* = 4.8, 14.0 Hz, 1H), 4.01 (dd, *J* = 4.8, 8.4 Hz, 1H), 4.68 (d, *J* = 3.6, 1H); <sup>13</sup>C NMR (100.6 MHz, CD<sub>3</sub>OD) δ 172.9, 101.4, 71.2, 71.1, 69.9, 69.6, 55.4, 51.4, 50.0, 32.8, 24.1, 22.0; LCMS = 276.1 (M+1); HRMS (ESI): *m/z* calculated for C<sub>12</sub>H<sub>21</sub>NO<sub>6</sub>Na [M+Na]<sup>+</sup> 298.1266, found 298.1260.

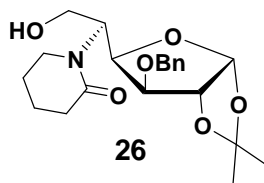

**5-N-(piperidine-2-one)-3-O-benzyl-5-deoxy-1, 2-O-isopropylidene- $\alpha$ -D-glucofuranoside (26).**

To minimize side product **VII** only 3 equivalents of  $\text{BF}_3 \cdot \text{Et}_2\text{O}$  was used. Yield 52%;  $[\alpha]^{23.2}_{\text{D}} = -8.98^\circ$  (*c* 1,  $\text{CH}_3\text{OH}$ ); IR ( $\text{CHCl}_3$ ): 1163, 1496, 3390  $\text{cm}^{-1}$ ;  $^1\text{H}$  NMR ( $\text{CD}_3\text{OD}$ , 400 MHz)  $\delta$  1.30 (s, 3H), 1.44 (s, 3H), 1.71-1.80 (m, 4H), 2.35 (t,  $J = 6.4$  Hz, 2H), 3.34-3.40 (m, 1H), 3.46-3.52 (m, 2H), 3.58 (dd,  $J = 2.8, 11.2$  Hz, 1H), 3.70-3.77 (m, 1H), 3.93 (bs, 1H), 4.49-4.58 (m, 2H), 4.73 (d,  $J = 11.2$  Hz, 1H), 4.77 (d,  $J = 3.6$  Hz, 1H), 5.86 (d,  $J = 4.0$  Hz, 1H), 7.29-7.39 (m, 5H);  $^{13}\text{C}$  NMR (100.6 MHz,  $\text{CD}_3\text{OD}$ )  $\delta$  173.6, 138.7, 129.4 (2C), 129.4, (2C), 129.0, 112.7, 105.8, 83.1, 82.6, 77.3, 72.6, 60.7, 33.4, 27.0, 26.4, 24.2, 23.9, 21.4 (2C); LCMS = 392.3 (M+1). Along with **26**, other compound **VII** (21%) also isolated and the tentative structure is shown below. Tentative structure assigned as drawn below for the minor product based on following spectral data.

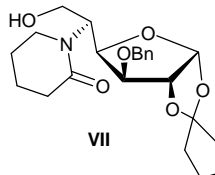

$[\alpha]^{23.3}_{\text{D}} = -4.00^\circ$  (*c* 0.5,  $\text{CH}_3\text{OH}$ ); IR ( $\text{CHCl}_3$ ): 1336, 1120, 1615, 3399  $\text{cm}^{-1}$ ;  $^1\text{H}$  NMR ( $\text{CD}_3\text{OD}$ , 400 MHz)  $\delta$  1.64-1.92 (series of m, 13H), 2.36 (t,  $J = 6.4$  Hz, 2H), 3.37-3.39 (m, 1H), 3.46-3.56 (m, 1H), 3.57 (dd,  $J = 2.8, 11.2$  Hz, 1H), 3.66-3.77 (m, 1H), 3.95 (d,  $J = 2.4$  Hz, 1H), 4.49-4.58 (m, 2H), 4.69-4.74 (m, 2H), 5.83 (d,  $J = 4.0$  Hz, 1H), 7.28-7.39 (m, 5H);  $^{13}\text{C}$  NMR (100.6 MHz,  $\text{CD}_3\text{OD}$ )  $\delta$  173.5, 138.7, 129.4 (2C), 129.3 (2C), 129.0, 122.3, 105.5, 83.2, 82.6, 77.4, 72.6, 60.8, 49.8, 37.8, 37.2, 33.4, 24.4 (2C), 23.9, 23.8, 21.4; LCMS = 418.3 (M+1).

### Synthesis of deoxy sugar azides:

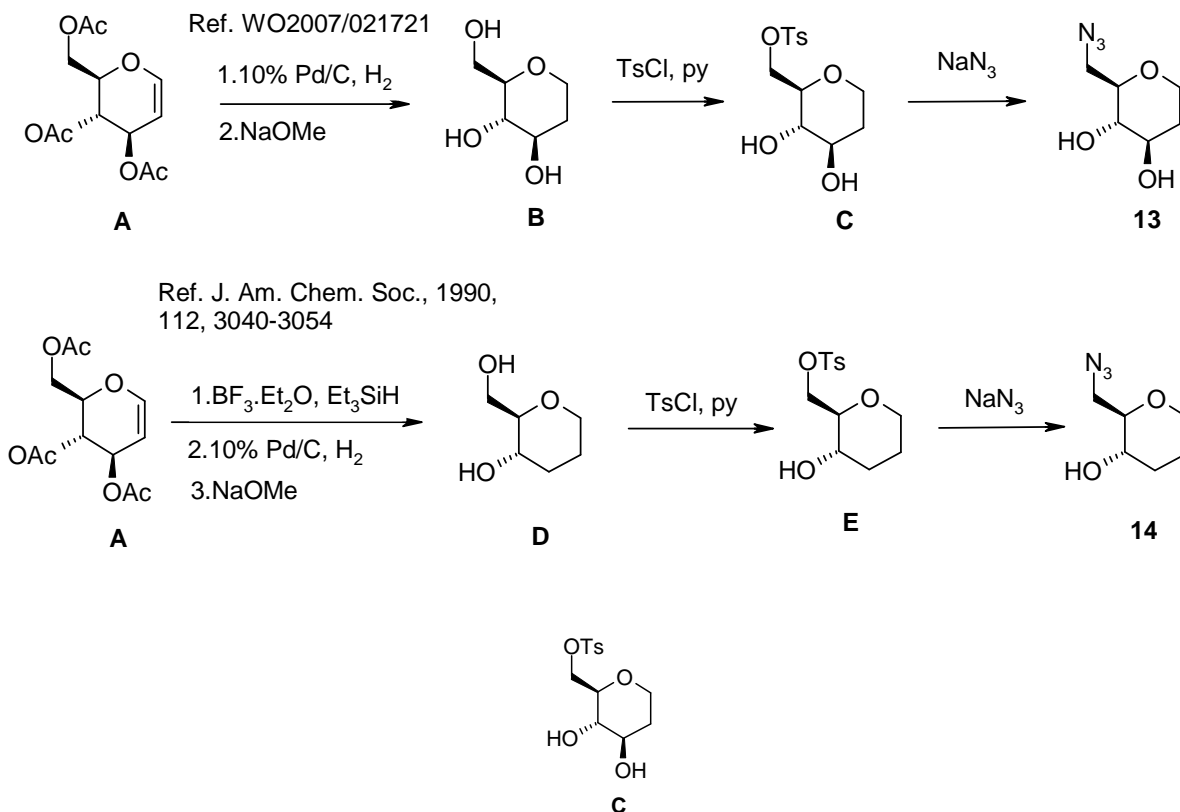

### Toluene-4-sulfonic acid (2R,3S,4R)-3,4-dihydroxy-tetrahydro-pyran-2-ylmethyl ester (C).<sup>2</sup>

To a solution of (2R, 3S, 4R)-2-ethyl-tetrahydro-pyran-3, 4-diol<sup>3</sup> (3.0g, 20.8 mmol) in pyridine (20 mL), *p*-toluenesulfonyl chloride (4.3 g, 22.9 mmol) was added and reaction mixture allowed to stir for overnight at room temperature. Reaction mixture was diluted with cold water and neutralized with 1N HCl (~pH 6) followed by extraction with dichloromethane (3X30 mL). Combined organic layer was washed with brine and dried over sodium sulfate. After evaporation of the solvent furnished the desired compound **C** (3.0g). Yield 48%; IR (CHCl<sub>3</sub>): 669, 771, 1215, 3019 cm<sup>-1</sup>; <sup>1</sup>H NMR (CD<sub>3</sub>OD, 400 MHz) δ 1.46-1.55 (m, 1H), 1.85 (dd, *J* = 4.8, 12.8 Hz, 1H), 1.98 (d, *J* = 9.6 Hz, 1H), 2.45 (s, 3H), 3.05 (t, *J* = 9.2 Hz, 1H), 3.22 (m, 1H), 3.35-3.47 (m, 1H), 3.80 (dd, *J* = 5.2, 10.8 Hz, 1H), 4.10 (dd, *J* = 5.2, 10.8 Hz, 1H), 4.30 (dd, *J* = 1.2, 10.4 Hz, 1H), 7.43 (d, *J* = 8.0 Hz, 2H), 7.78 (d, *J* = 8.4 Hz, 2H); <sup>13</sup>C NMR (100.6 MHz, CD<sub>3</sub>OD) δ 146.4, 134.4, 130.9 (2C), 129.0 (2C), 79.4, 73.8, 72.9, 71.3, 66.5, 34.8, 21.5; LCMS = 303.0 (M+1).

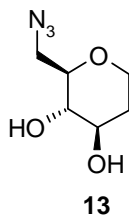

**(2*R*,3*S*,4*R*)-2-Azidomethyl-tetrahydro-pyran-3,4-diol (13).**

To a solution **C** (800 mg, 2.64 mmol) in DMF (10 mL), sodium azide (1.80 g, 26.4 mmol) was added and the reaction mixture was allowed to stir for 18 hours at 80 °C. Reaction mixture was diluted with cold water and extracted with dichloromethane (3X30 mL). Combined organic layer was washed with brine, dried over sodium sulfate and evaporation of solvent resulted in compound **13** (300 mg). Yield 66%; IR (CHCl<sub>3</sub>): 2099, 3400cm<sup>-1</sup>; <sup>1</sup>H NMR (CD<sub>3</sub>OD, 400 MHz) δ 155-1.65 (m, 1H), 1.88-1.93 (m, 1H), 3.14 (t, *J* = 9.3 Hz, 1H), 3.21-3.26 (m, 1H), 3.37 (dd, *J* = 6.9, 13.2 Hz, 1H), 3.42-3.53 (m, 3H), 3.90-3.94 (m, 1H); <sup>13</sup>C NMR (100.6 MHz, CD<sub>3</sub>OD) δ 81.1, 74.1, 73.8, 66.6, 53.0, 35.0; LCMS = 191.1 (M+18).

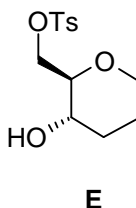

**Toluene-4-sulfonic acid (2*R*,3*S*)-3-hydroxy-tetrahydro-pyran-2-ylmethyl ester<sup>4</sup> (E).**

To a solution of ((2*R*,3*S*)-2-Hydroxymethyl-tetrahydro-pyran-3-ol<sup>5</sup> (2.0 g, 15.15 mmol) in pyridine (20 mL), *p*-Toluenesulfonyl chloride (3.45 g, 18.18 mmol) was added and reaction mixture allowed to stir for overnight at room temperature. Reaction mixture was diluted with ice water and neutralized with 1N HCl to pH 6 followed by extraction with dichloromethane (3X30 mL), combined organic layer washed with brine and dried with sodium sulfate. After evaporation of solvent furnished the title compound **E** (3.1g). Yield 70%; IR (CHCl<sub>3</sub>): 669, 771, 1216, 3019 cm<sup>-1</sup>; <sup>1</sup>H NMR (CD<sub>3</sub>OD, 400 MHz) δ 1.34-1.41 (m, 2H), 1.55-1.62 (m, 2H), 2.01-2.05 (m, 1H), 2.45 (s, 3H), 3.15-3.19 (m, 1H), 3.22-3.26 (m, 1H), 3.76-4.08 (m, 1H), 4.06 (dd, *J* = 6.0, 10.4 Hz, 1H), 4.28 (dd, *J* = 1.6, 10.8 Hz, 1H), 7.43 (d, *J* = 8.0 Hz, 2H), 7.78 (d, *J* = 8.0 Hz, 2H); <sup>13</sup>C NMR (100.6 MHz, CD<sub>3</sub>OD) δ 146.3, 134.3, 130.9 (2C), 129.1 (2C), 81.4, 71.5, 68.5, 66.7, 33.6, 26.3, 21.6; LCMS = 287.0 (M+1).

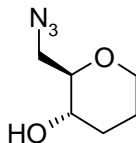

**14**

**(2*R*, 3*S*)-2-Azidomethyl-tetrahydro-pyran-3-ol (14).**

To a solution of **E** (1.0 g, 3.49 mmol) in DMF (10 mL), sodium azide (2.49 g, 34.9 mmol) was added and reaction mixture allowed to stir for 18 hours at 80 °C. Reaction mixture was diluted with ice water and extraction with dichloromethane (3X30 mL), combined organic layer washed with brine, dried over sodium sulfate, and evaporation of solvent resulted in **14** (480 mg). Yield 86%. IR (CHCl<sub>3</sub>): 2099, 3400 cm<sup>-1</sup>; <sup>1</sup>H NMR (CD<sub>3</sub>OD, 400 MHz) δ 1.36-1.46 (m, 1H), 1.62-1.70 (m, 2H), 2.05-2.08 (m, 1H), 3.16-3.20 (m, 1H), 3.32-3.38 (m, 3H), 3.48 (d, *J* = 13.2 Hz, 1H), 3.86-3.92 (m, 1H); <sup>13</sup>C NMR (100.6 MHz, CD<sub>3</sub>OD) δ 83.1, 68.6, 68.0, 53.1, 33.5, 26.5; LCMS = 175.2 (M+18).

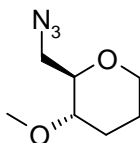

**19**

**(2*R*, 3*S*)-2-Azidomethyl-3-methoxy-tetrahydro-pyran (19).**

To a solution of **(14)** (200 mg, 1.25 mmol) in anhydrous THF (5 mL), sodium hydride (60% in mineral oil, 90 mg, 1.88 mmol) was added at 0 °C and reaction mixture allowed to stir for one hour at room temperature. Reaction mixture was cooled again to 0 °C and methyl iodide (0.16 mL, 3.7 mmol) added and stirring continued for another hour at room temperature. Reaction mixture was diluted with ice water and extraction with dichloromethane (3X15 mL). The combined organic layer was washed with brine, dried over sodium sulfate and evaporation of solvent led to compound **19** (185 mg). Yield 85%; IR (CHCl<sub>3</sub>): 1099, 1432, 2099 cm<sup>-1</sup>; <sup>1</sup>H NMR (CDCl<sub>3</sub>, 400 MHz) δ 1.23-1.33 (m, 2H), 1.61-1.70 (m, 2H), 2.30-2.33 (m, 1H), 3.05-3.09 (m, 1H), 3.24-2.28 (m, 1H), 3.35 (s, 3H), 3.37-3.43 (m, 1H), 3.52- 3.55 (d, *J* = 12.8 Hz, 1H), 3.96 (dd, *J* = 4.4, 13.6 Hz, 1H); <sup>13</sup>C NMR (100.6 MHz, CDCl<sub>3</sub>) δ 80.0, 75.9, 67.9, 56.3, 52.3, 28.3, 25.1.

**Unsuccessful efforts toward alternate synthesis of sugar lacatam 3.**

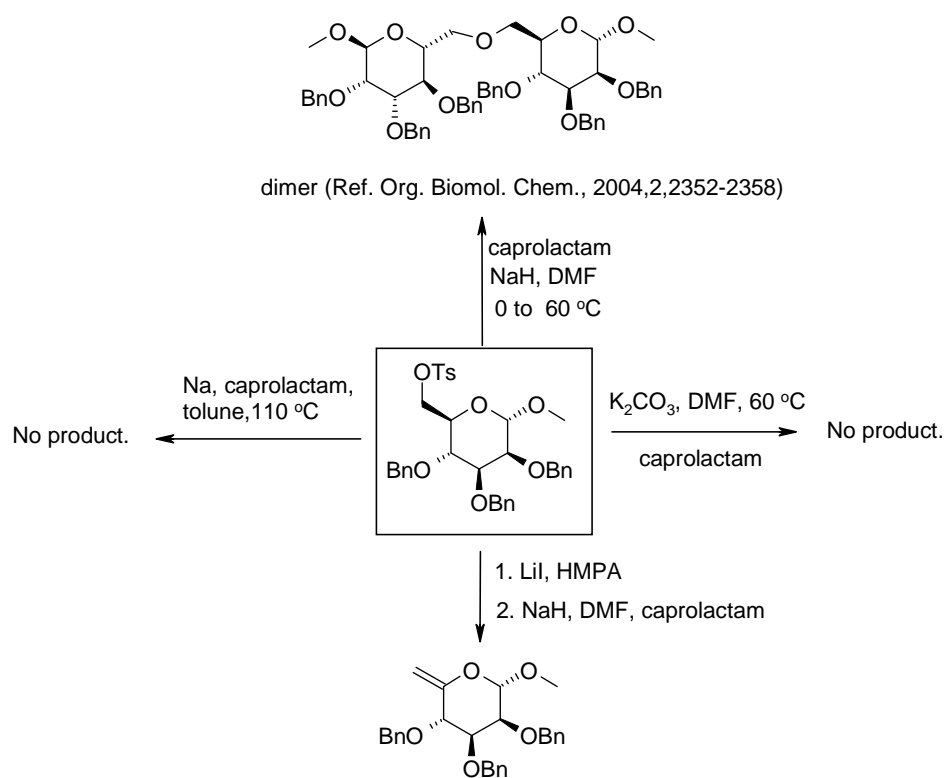

### Alternate route to the synthesis of sugar-lactam **3**.

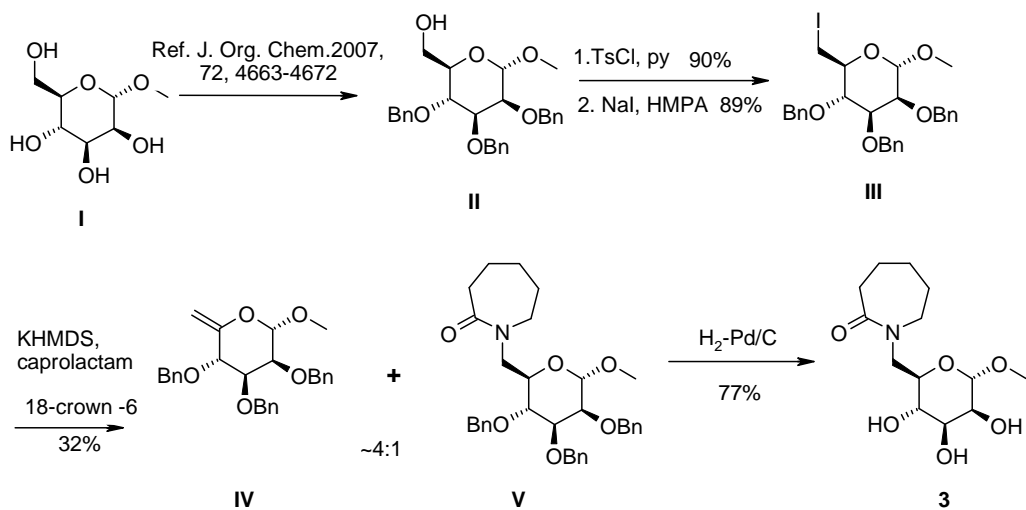

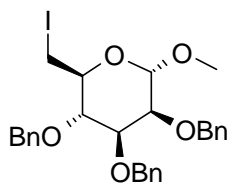

III

**Methyl 6-deoxy-6-iodo-2, 3, 4-tri-O-benzyl- $\alpha$ -D-mannopyranoside (III).**<sup>6</sup> To a solution of 2, 3, 4-Tri-O-benzyl- $\alpha$ -methyl-D-mannopyranoside<sup>7</sup> (2.0 g, 4.30 mmol) in pyridine (20 mL), *p*-toluenesulfonyl chloride (2.0 g, 4.31 mmol) was added and the reaction mixture allowed to stir for 6 hours at room temperature. Reaction mixture was diluted with ice water and neutralized with 1N HCl (~ pH 6) followed by extraction with dichloromethane (3X30 mL). The combined organic layer washed with brine, dried over sodium sulfate and evaporation of solvent resulted in crude product, which was purified by column chromatography (10%EtOAc:Hexane) to furnish the tosylate (2.4 g). Yield 90%;  $[\alpha]^{25.8}_D = +15.6^\circ$  (*c* 1, CH<sub>3</sub>OH); IR (CHCl<sub>3</sub> 1215, 3019 cm<sup>-1</sup>; <sup>1</sup>H NMR (CDCl<sub>3</sub>, 400 MHz)  $\delta$  2.39 (s, 3H), 3.24(s, 3H), 3, 74-3.82 (m, 4H), 4.21-4.28 (m, 2H), 4.45 (d, *J* = 11.2 Hz, 1H), 4.56 (s, 2H), 4.64-4.67 (m, 3H), 4.66 (d, *J* = 10.8 Hz, 1H), 7.18 (s, 2H), 7.25-7.30 (m, 15H), 7.77(d, *J* = 6.4 Hz, 2H); <sup>13</sup>C NMR (100.6 MHz, CDCl<sub>3</sub>)  $\delta$  144.9, 138.5, 138.4, 138.3, 133.2, 130.0 (2C), 128.6 (4C), 128.3 (2C), 128.2 (2C), 128.1 (2C), 128.0 (2C), 128.0 (2C), 127.9, 127.9 (2C), 99.1, 80.3, 75.3, 74.5, 74.3, 72.9, 72.3, 70.2, 69.5, 55.1, 21.9; LCMS = 635.9 (M+18);

To a solution of above tosylate (2.0 g, 3.23 mmol) in toluene (50 mL), HMPA (5.63 ml, 32.36 mmol) and lithium iodide (4.3 g, 32.36 mmol) was added and reaction mixture was refluxed for 24 hours. Reaction mixture was diluted with ice water and extraction with ethyl acetate (3X30 mL), combined organic layer washed with aq. sodium thiosulfate, brine and dried with sodium sulfate. The crude product obtained after evaporation of solvent was purified using 10% EtoAc: hexane to furnish the title compound III (1.6 g). Yield 89%;  $[\alpha]^{24.8}_D = +22.4^\circ$  (*c* 1, CH<sub>3</sub>OH); IR (CHCl<sub>3</sub>): 669, 771, 1215, 3019 cm<sup>-1</sup>; <sup>1</sup>H NMR (CD<sub>3</sub>OD, 400 MHz)  $\delta$  3.29-3.31 (m, 1H), 3.36 (s, 3H), 3.49-3.57 (m, 2H), 3.74-3.78 (m, 2H), 3.88 (dd, *J* = 7.0, 2.0 Hz, 1H), 4.59 (s, 2H), 4.65-4.68 (m, 1H), 4.72-4.76 (m, 3H), 4.98 (d, *J* = 10.8 Hz, 1H), 7.20- 7.30 (m, 15H); <sup>13</sup>C NMR (100.6 MHz, CD<sub>3</sub>OD)  $\delta$  138.5, 138.5, 138.4, 128.7 (2C), 128.7 (2C), 128.6 (2C), 128.3 (2C), 128.1 (2C), 127.9 (2C), 127.9, 127.9(2C), 99.3, 80.2, 78.8, 75.7, 74.8, 73.0, 72.3, 71.7, 55.3, 7.4; LCMS = 592 (M+18);



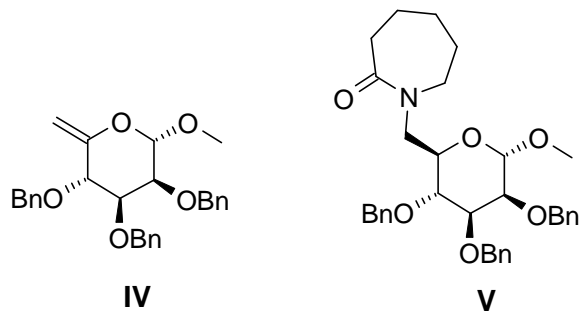

**6-Deoxyhex-eno-pyranoside(IV) and Methyl 6-deoxy-2,3,4-tri-O-benzyl-6-N-azepan-2-one- $\alpha$ -D-mannopyranoside (V).** To a solution of caprolactam (395 mg, 3.48 mmol) in dry THF (5 mL), KHMDS (0.5 M in toluene 7.0 ml, 3.48 mmol) was added at 0 °C followed by 18-crown-6 (197 mg, 0.87 mmol) and the reaction mixture was allowed to stir at room temperature for 3 hrs. After that reaction mixture was cooled to 0°C and a solution of **III** (1.0g, 1.74 mmol) in THF (10ml) was added. After stirring for two hours at room temperature, the reaction mixture was heated to 50 °C for 12 hours. Reaction was quenched with saturated aq.NH<sub>4</sub>Cl (10 mL) at room temperature. Reaction mixture was extracted with ethyl acetate (3X25 mL), washed the combined organic layer with brine and dried over sodium sulfate. The crude product obtained after evaporation of solvent was purified using preparative HPLC to furnish compound **IV** (200 mg, 26%) and **V**, (60 mg, 6%).

Spectral data for **IV**.  $[\alpha]^{25.8}_D = -18.2^\circ$  (*c* 1, CH<sub>3</sub>OH); IR (CHCl<sub>3</sub>): 669, 1215, 3019 cm<sup>-1</sup>; <sup>1</sup>H NMR (CD<sub>3</sub>OD, 400 MHz)  $\delta$  3.40 (s, 3H), 3.83-3.86 (m, 1H), 3.88 (d, *J* = 2.8 Hz, 1H), 4.34 (d, *J* = 8.4 Hz, 1H), 4.63- 4.80 (m, 9H), 7.25-7.36 (m, 15H); <sup>13</sup>C NMR (100.6 MHz, CD<sub>3</sub>OD)  $\delta$  154.9, 138.7, 138.4, 138.4, 128.6 (2C), 128.5, 128.5, 128.4 (2C), 128.1(2C), 128.0, 128.0, 127.9 (2C), 127.8, 127.8, 127.7, 100.9, 96.9, 78.8, 76.9, 75.8, 73.8, 73.4, 73.1, 55.6; LCMS = 464.0 (M+18); HPLC Purity (%) = 99.2; Spectral data for **V**:-  $[\alpha]^{25.8}_D = -1.04^\circ$ (*c* 1, CH<sub>3</sub>OH); IR (CHCl<sub>3</sub>): 669, 771, 1215, 1658cm<sup>-1</sup>; <sup>1</sup>H NMR (CD<sub>3</sub>OD, 400 MHz)  $\delta$  1.65 (s, 6H), 2.50-2.54 (m, 2H), 3.27 (s, 3H), 3.47-3.49 (m, 2H), 3.56 (dd, *J* = 7.6, 13.9 Hz, 1H), 3.68 (t, *J* = 9.3 Hz, 1H), 3.58-3.78 (m, 2H), 3.87-3.94 (m, 2H), 4.60 (s, 2H), 4.67-4.77 (m, 4H), 4.90 (d, *J* = 10.5 Hz, 1H), 7.18-7.40 (m, 15H); <sup>13</sup>C NMR (100.6 MHz, CD<sub>3</sub>OD)  $\delta$  181.3, 143.8, 143.5, 143.4, 133.5 (2C), 133.4, 133.4, 133.2 (2C), 133.1 (2C), 133.0 (2C), 132.9 (2C), 132.8, 132.7, 132.6, 104.1, 85.2, 82.5, 82.4, 82.2, 81.9, 81.4, 79.8, 59.9, 56.3, 54.4, 42.5, 35.1, 33.4, 28.6; LCMS = 560.4 (M+1); HPLC Purity (%) = 98.4; HRMS (ESI): *m/z* calculated for C<sub>34</sub>H<sub>41</sub>NO<sub>6</sub>Na [M + Na]<sup>+</sup> 582.2831 found 582.2826.

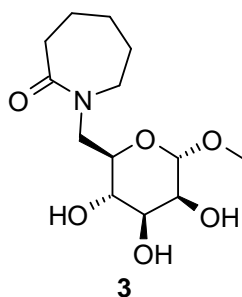

**Methyl 6-deoxy-6-N-azepan-2-one- $\alpha$ -D-mannopyranoside (3).** 10% dry Pd/C (10 mg) was added to the solution **V** (50 mg, 0.08 mmol) in EtOAc:ethanol (3:1) mixture. Reaction mixture was stirred under hydrogen atmosphere for 18 hours at room temperature and filtered through a celite pad. Evaporation of solvent furnished the title compound **3** (20 mg) in 77% yield. The spectral data ( $^1\text{H}$  and  $^{13}\text{C}$ ) is compared with that of **3** prepared using Aube reaction and found that they are identical.

#### References:

1. Wu, X. J.; Tang, X.; Xian, M.; Braunschweiger, P. G.; Wang, P. G. *Bioorg. Med. Chem.* 2002, **10**, 2303.
2. Tamaruya, Y.; Suzuki, M.; Kamura, G.; Kanai, M.; Hama, K.; Shimizu, K.; Aoki, J.; Arai, H.; Shibasaki, M. *Angew. Chem., Int. Ed.* 2004, **43**, 2834.
3. Magnani, J. L.; Patton, J. T. Jr.; Sarkar, A. K. WO Patent, WO021721, 2007.
4. Delgado, M.; Martin, J. D. *J. Org. Chem.* 1999, **64**, 4798.
5. Nicolaou, K. C.; Hwang, C.-K.; Marron, B. E.; DeFrances, S.; Couladouro, E. A.; Abe, Y.; Carrol, P. J.; Snyder, J. P. *J. Am. Chem. Soc.*, 1990, **112**, 3040.
6. Skaanderup, P. R.; L.; Madsen, R. *J. Org. Chem.* 2003, **68**, 2115.
7. El-Badri, M. H.; Willenbring, D.; Tantillo, D. J.; Gerva-Hague, J. *J. Org. Chem.* 2007, **72**, 4663.

ADV-TRNG-06-011  
09 June 2009  
Advirus Therapeutics Pune

File: Proton

Pulse Sequence: s2pul

Solvent: cd3od

Ambient temperature

Operator: vnmr1

VNMR-400 "wormhole"

Relax. delay 2.000 sec  
Pulse 45.0 degrees  
Acq. time 1.700 sec  
Width 8012.8 Hz  
141 repetitions  
OBSERVE H1, 399.9274529 MHz  
DATA PROCESSING  
Line broadening 0.2 Hz  
FT size 65536  
Total time 2 hr, 34 min, 32 sec

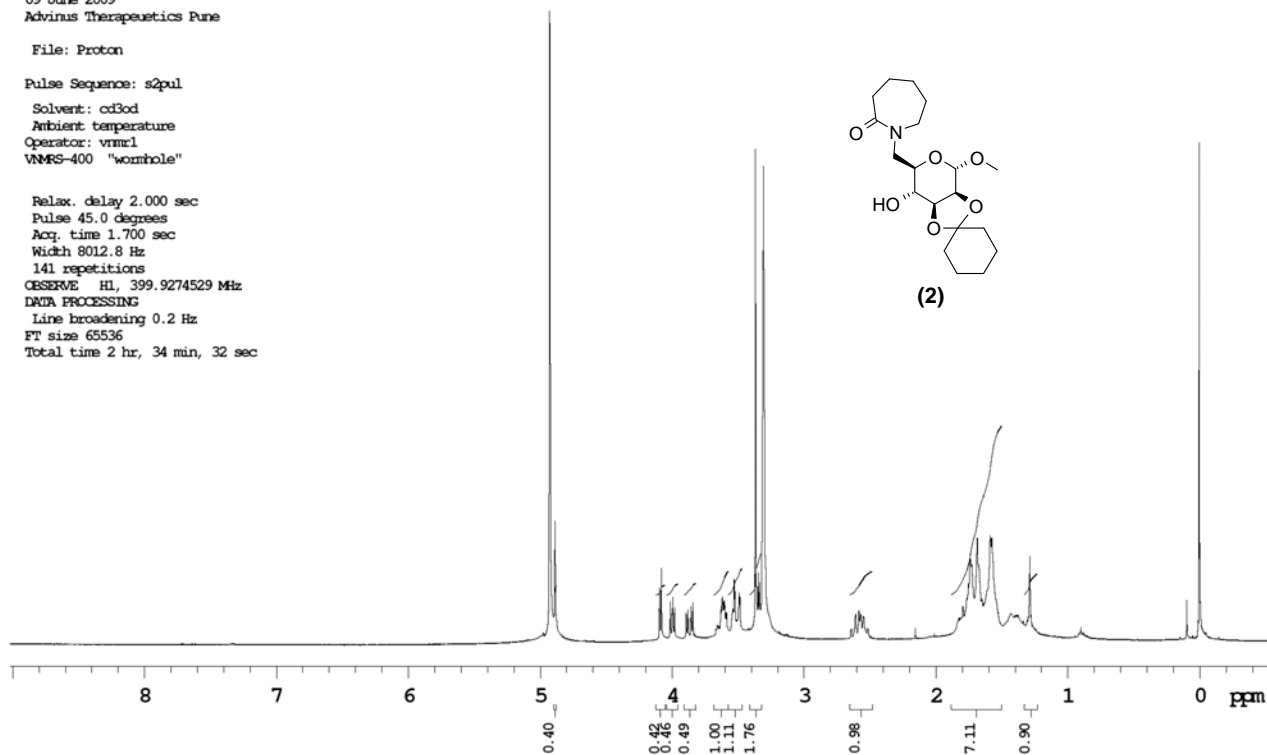

ADV-TRNG-06-011  
27 June 2009  
Advirus Therapeutics Pune

Sample Name:

Archive directory:

Sample directory:

FidFile: ADV-TRNG-06-011-13C

Pulse Sequence: Carbon (s2pul)

Solvent: cd3od

Data collected on: Jun 27 2009

Operator: vnmr1

VNMR-400 "DEIRE400"

Relax. delay 2.000 sec  
Pulse 45.0 degrees  
Acq. time 1.300 sec  
Width 24509.8 Hz  
428 repetitions  
OBSERVE C13, 100.5616968 MHz  
DECOUPLE H1, 399.9294541 MHz  
Power 40 dB  
continuously on  
WALTZ-16 modulated  
DATA PROCESSING  
Line broadening 1.0 Hz  
FT size 65536  
Total time 9 hr, 11 min

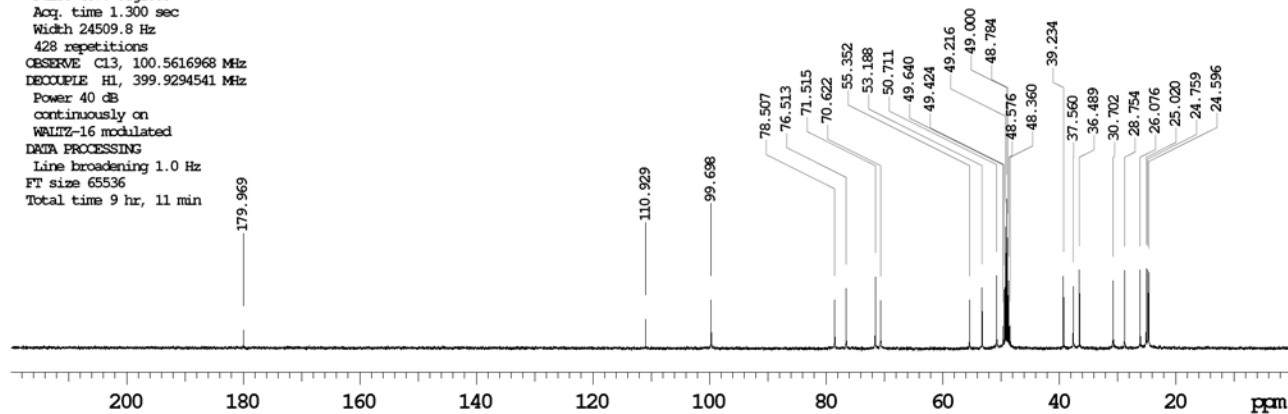

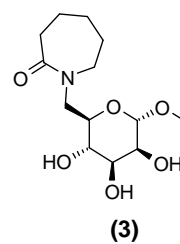

ADV-trng-06-II  
Advinus Therapeutics Pune

Sample Name:

Data Collected on:  
DZIRE400-vnmr400

Archive directory:

Sample directory:

FidFile: Proton

Pulse Sequence: Proton (s2pul)  
Solvent: cd3od  
Data collected on: Apr 5 2010

Temp. 20.0 C / 293.1 K  
Operator: vnmr1

Relax. delay 1.300 sec  
Pulse 45.0 degrees  
Acq. time 1.700 sec  
Width 8012.8 Hz  
48 repetitions  
OBSERVE H1, 399.9274541 MHz  
DATA PROCESSING  
Line broadening 0.4 Hz  
FT size 65536  
Total time 51 min

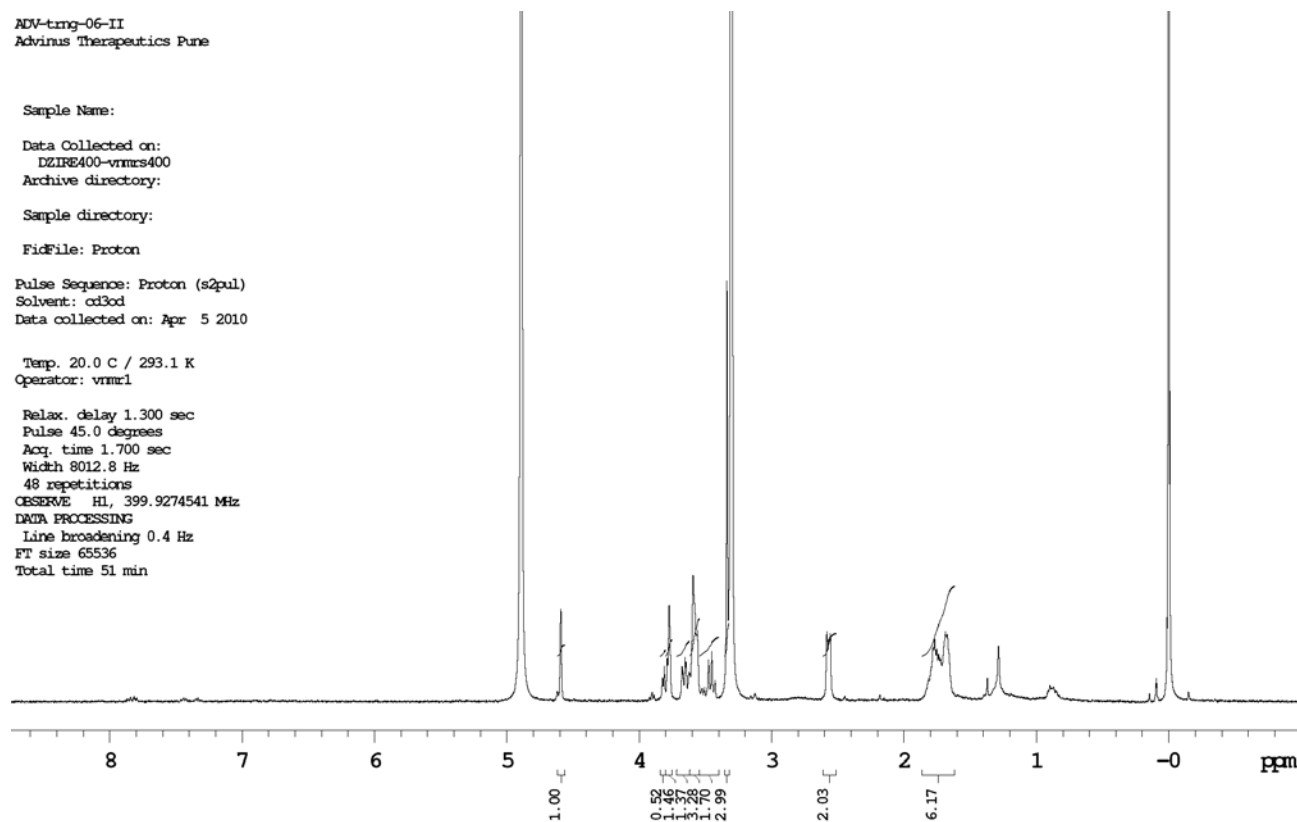

ADV-TRNG-011-02  
27 June 2009  
Advinus Therapeutics Pune

Sample Name:

Archive directory:

Sample directory:

FidFile: ADV-TRNG-011-02-13C

Pulse Sequence: Carbon (s2pul)  
Solvent: cd3od  
Data collected on: Jun 27 2009

Operator: vnmr1  
VNMRS-400 "DZIRE400"

Relax. delay 2.000 sec  
Pulse 45.0 degrees  
Acq. time 1.300 sec  
Width 24509.8 Hz  
296 repetitions  
OBSERVE C13, 100.5616968 MHz  
DECUPLE H1, 399.9294541 MHz  
Power 40 dB  
continuously on  
WALTZ-16 modulated  
DATA PROCESSING  
Line broadening 1.0 Hz  
FT size 65536  
Total time 9 hr, 11 min

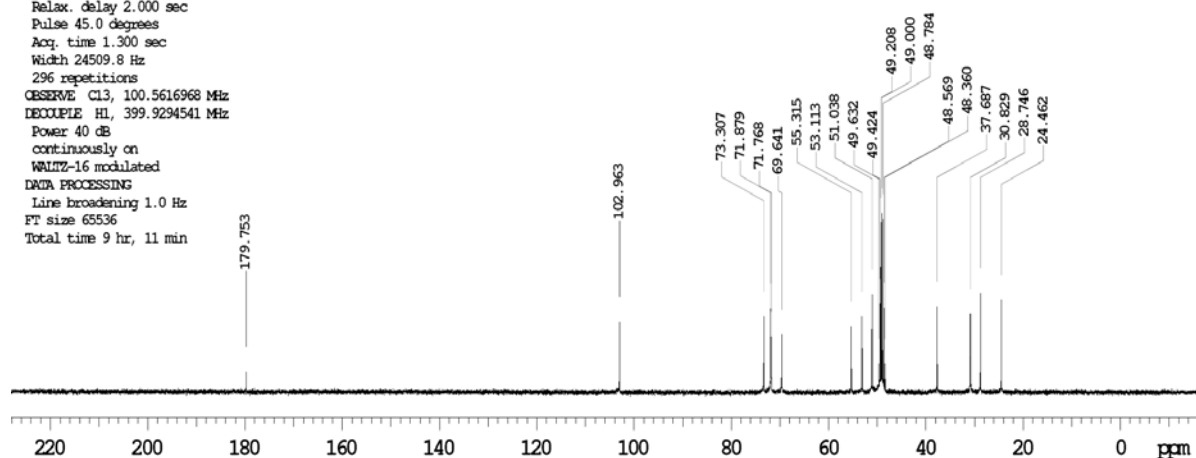

ADV-P-247-069-R  
Advirus Therapeutics Pune

Sample Name:

Data Collected on:  
DZIRE400-vrms400  
Archive directory:

Sample directory:

FidFile: ADV-P-247-169-R

Pulse Sequence: Proton (s2pul)  
Solvent: cd3od  
Data collected on: Apr 8 2010

Operator: vrmr1

Relax. delay 1.300 sec  
Pulse 45.0 degrees  
Acq. time 1.700 sec  
Width 8012.8 Hz  
56 repetitions  
OBSERVE H1, 399.9274546 MHz  
DATA PROCESSING  
Line broadening 0.4 Hz  
FT size 65536  
Total time 51 min

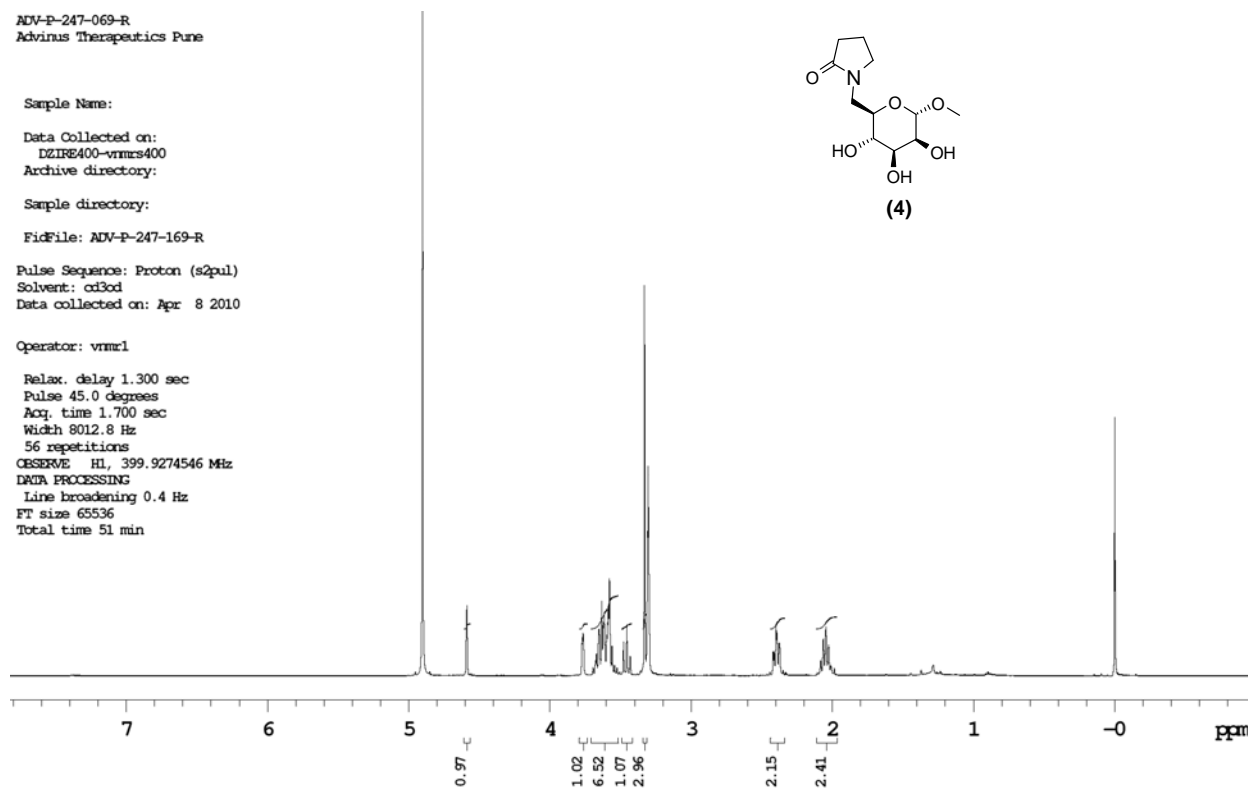

ADV-P-247-069-R  
13C Experiment  
Advirus Pune

Sample Name:

Data Collected on:  
DZIRE400-vrms400  
Archive directory:

Sample directory:

FidFile: CARECN

Pulse Sequence: CARECN (s2pul)  
Solvent: cd3od  
Data collected on: Apr 8 2010

Operator: vrmr1

Relax. delay 1.000 sec  
Pulse 45.0 degrees  
Acq. time 1.285 sec  
Width 25510.2 Hz  
48 repetitions  
OBSERVE C13, 100.5617002 MHz  
DECUPLE H1, 399.9294538 MHz  
Power 36 dB  
continuously on  
WALTZ-16 modulated  
DATA PROCESSING  
Line broadening 0.5 Hz  
FT size 65536  
Total time 18 hr, 28 min

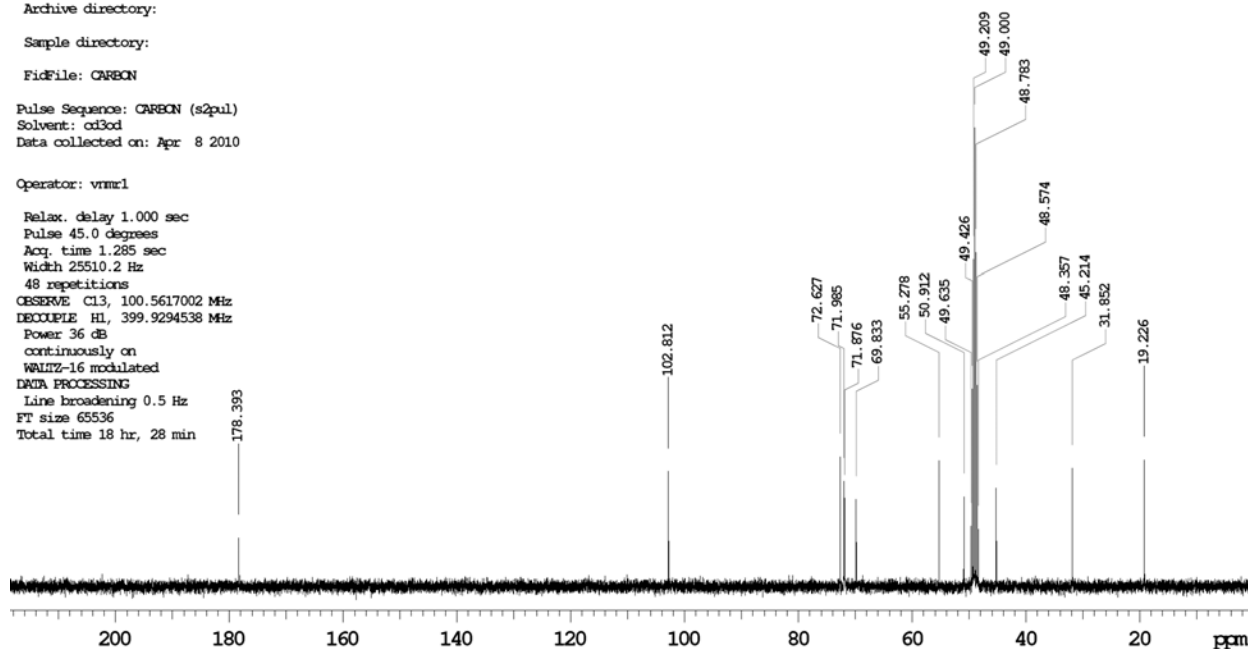

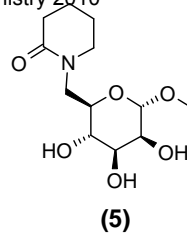

ADV-P-247-068A  
15 June 2009  
Advinus Therapeutics Pune

File: Proton

Pulse Sequence: s2pul

Solvent: cd3od  
Ambient temperature  
Operator: vrmc1  
NMRS-400 "wormhole"

Relax. delay 2.000 sec  
Pulse 45.0 degrees  
Acq. time 1.700 sec  
Width 8012.8 Hz  
37 repetitions  
OBSERVE HL, 399.9274546 MHz  
DATA PROCESSING  
Line broadening 0.5 Hz  
FT size 32768  
Total time 2 hr, 34 min, 32 sec

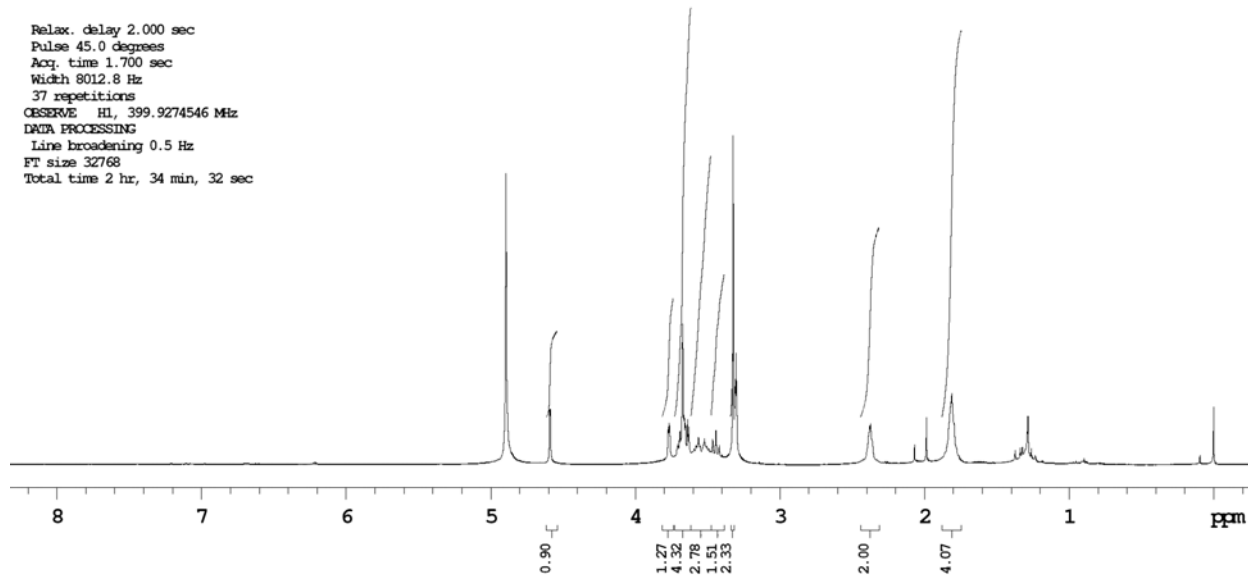

ADV-P-247-068A  
27 June 2009  
Advinus Therapeutics Pune

Sample Name:

Archive directory:

Sample directory:

FidFile: ADV-P-247-068A-13C

Pulse Sequence: Carbon (s2pul)  
Solvent: cd3od  
Data collected on: Jun 27 2009

Operator: vrmc1  
NMRS-400 "DZIRE400"

Relax. delay 2.000 sec  
Pulse 45.0 degrees  
Acq. time 1.300 sec  
Width 24509.8 Hz  
456 repetitions  
OBSERVE C13, 100.5616975 MHz  
DECOUPLE HL, 399.9294541 MHz  
Power 40 dB  
continuously on  
WALTZ-16 modulated  
DATA PROCESSING  
Line broadening 1.0 Hz  
FT size 65536  
Total time 9 hr, 11 min

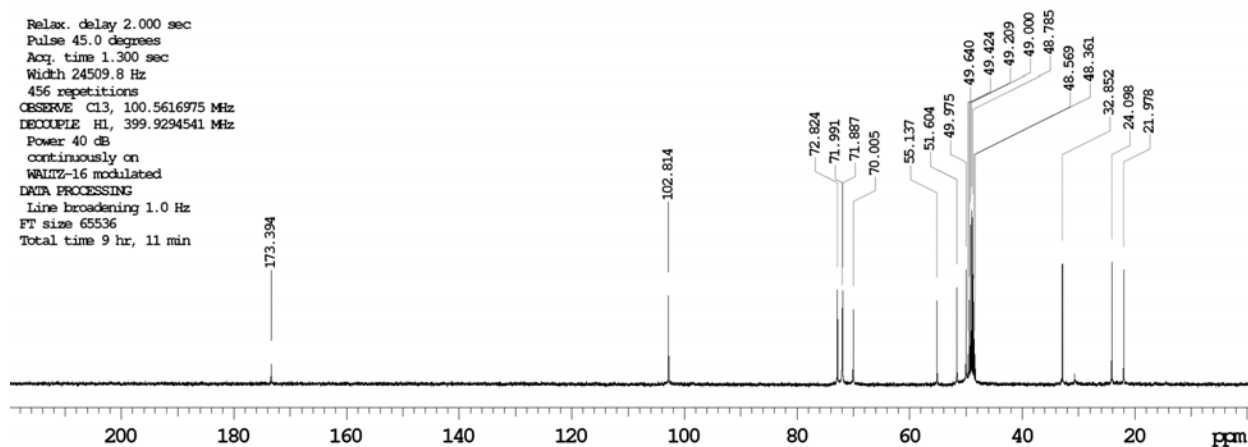

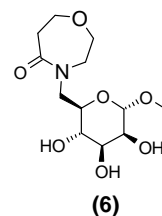

ADV-P-247-084-A  
24 August 2009  
Advinus pune

Sample Name:  
Data Collected on:  
wormhole-vrms400  
Archive directory:  
Sample directory:  
FidFile: ADV-P-247-084A  
Pulse Sequence: PROTON (s2pul)  
Solvent: cd3od  
Data collected on: Aug 24 2009

Temp. 25.0 C / 298.1 K  
Operator: vrmcl

Relax. delay 1.000 sec  
Pulse 45.0 degrees  
Acq. time 2.049 sec  
Width 8012.8 Hz  
40 repetitions  
OBSERVE H1, 399.9274541 MHz  
DATA PROCESSING  
Line broadening 0.2 Hz  
FT size 65536  
Total time 21 hr, 13 min

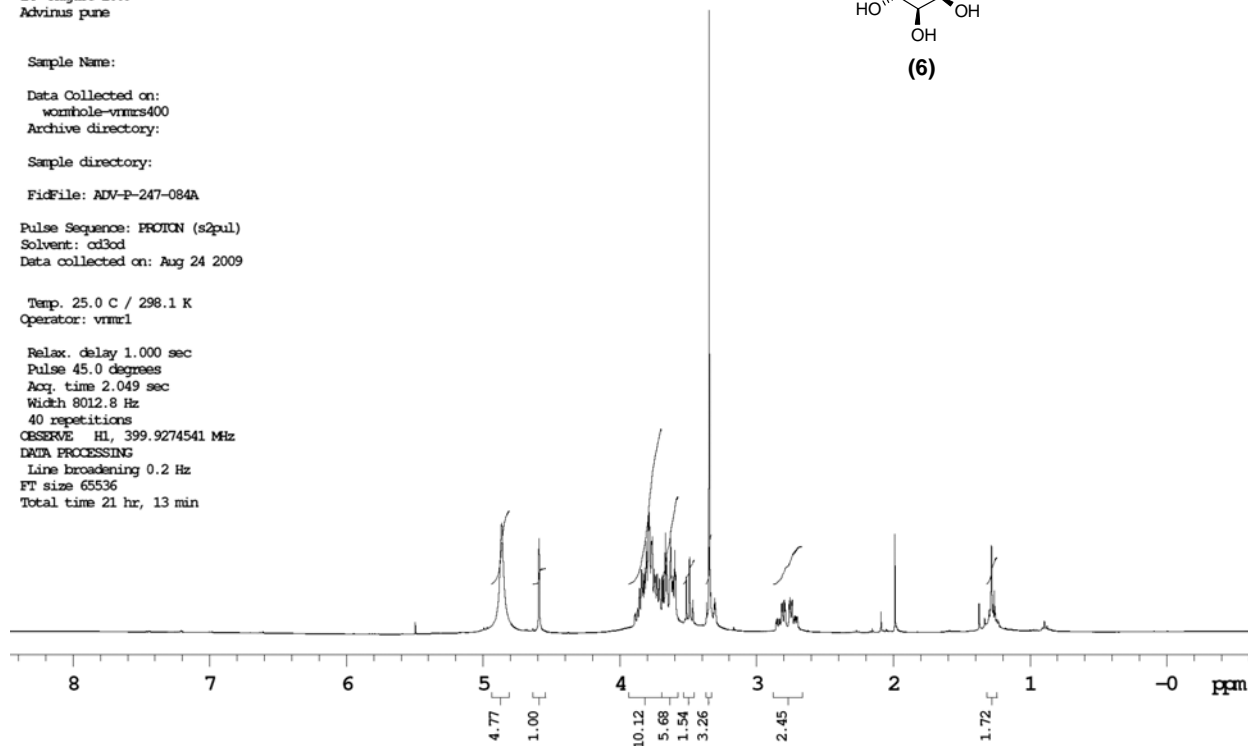

ADV-P-247-084-A  
14 August 2009  
CL3 EXPERIMENT

Sample Name:  
Data Collected on:  
wormhole-vrms400  
Archive directory:  
Sample directory:  
FidFile: ADV-P-247-084-A-CL3  
Pulse Sequence: Carbon (s2pul)  
Solvent: cd3od  
Data collected on: Aug 21 2009

Temp. 25.0 C / 298.1 K  
Operator: vrmcl

Relax. delay 2.000 sec  
Pulse 45.0 degrees  
Acq. time 1.300 sec  
Width 24509.8 Hz  
64 repetitions  
OBSERVE CL3, 100.5617002 MHz  
DECOUPLE H1, 399.9294538 MHz  
Power 40 dB  
continuously on  
WALTZ-16 modulated  
DATA PROCESSING  
Line broadening 0.5 Hz  
FT size 65536  
Total time 2298 hr, 11 min

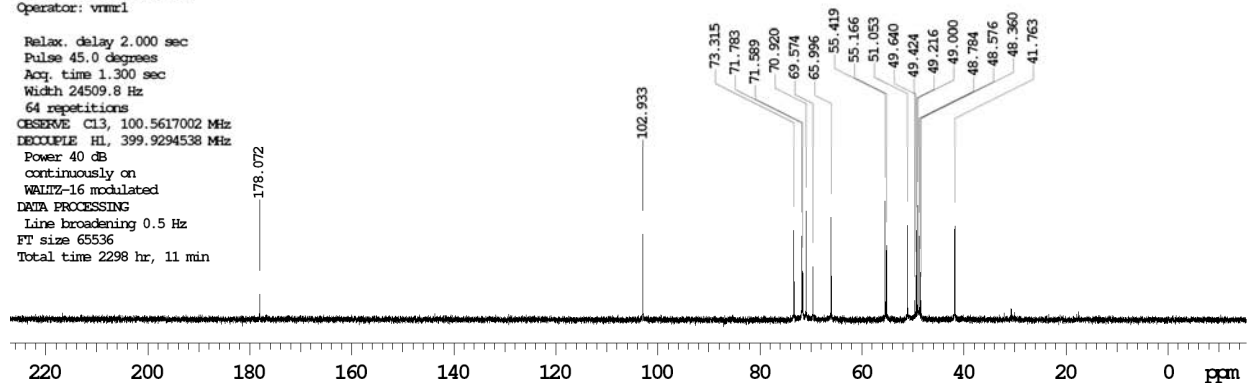



ADV-P-247-073-I  
13 July 2009  
Advinus Therapeutics Pune

File: ADV-P-247-073-I

Pulse Sequence: s2pul  
Solvent: cd3od  
Ambient temperature  
Operator: vrmc1  
File: ADV-P-247-073-I  
VMRS-400 "wormhole"

Relax. delay 1.300 sec  
Pulse 45.0 degrees  
Acq. time 1.700 sec  
Width 8012.8 Hz  
68 repetitions  
OBSERVE HI, 399.9274546 MHz  
DATA PROCESSING  
Line broadening 0.4 Hz  
FT size 65536  
Total time 51 min, 20 sec

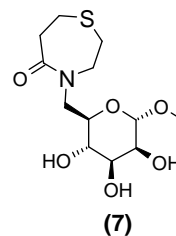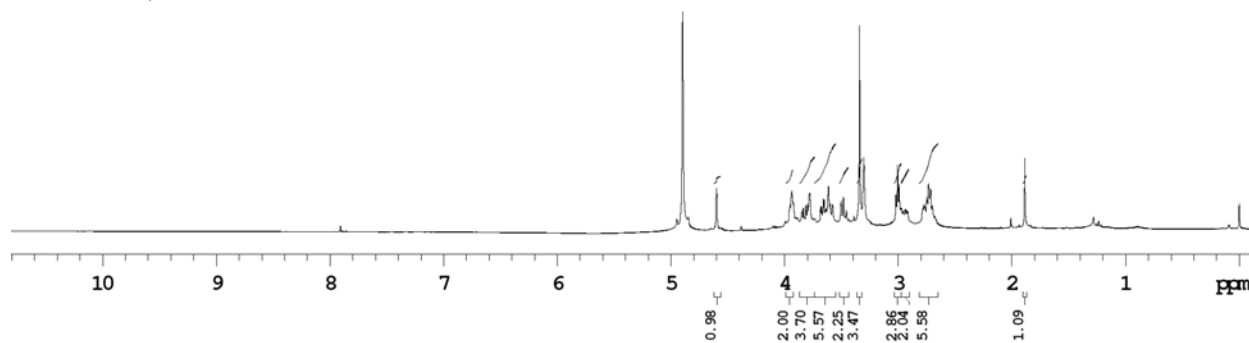

ADV-P-247-073-I  
Cl3 Experiment  
13 July 2009  
ADVINUS PUNE

Sample Name:  
Archive directory:  
Sample directory:  
FidFile: ADV-P-247-073-I-Cl3  
Pulse Sequence: Carbon (s2pul)  
Solvent: cd3od  
Data collected on: Jul 13 2009

Operator: vrmc1  
VMRS-400 "DZIRE400"

Relax. delay 1.300 sec  
Pulse 45.0 degrees  
Acq. time 1.300 sec  
Width 24509.8 Hz  
712 repetitions  
OBSERVE Cl3, 100.5616953 MHz  
DECOUPLE HI, 399.9294541 MHz  
Power 40 dB  
continuously on  
WALTZ-16 modulated  
DATA PROCESSING  
Line broadening 0.5 Hz  
FT size 65536  
Total time 36 hr, 14 min

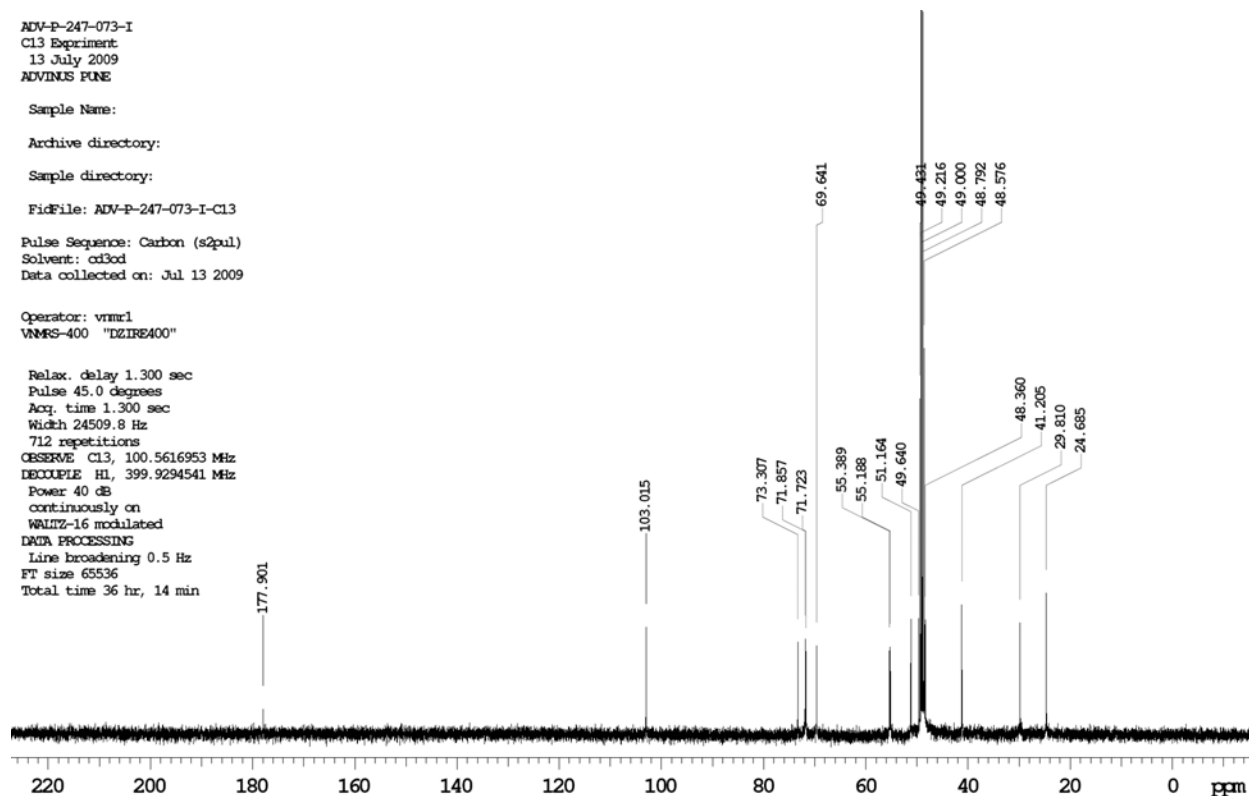

ADV-P-425-017  
 Advirus Therapeutics Pune

Sample Name:

Data Collected on:  
 DZIRE400-vnmrs400  
 Archive directory:

Sample directory:

FidFile: ADV-P-425-017

Pulse Sequence: Proton (s2pul)  
 Solvent: cdcl3  
 Data collected on: Apr 14 2010

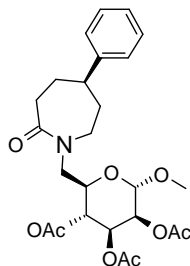

Triacetate of (8)

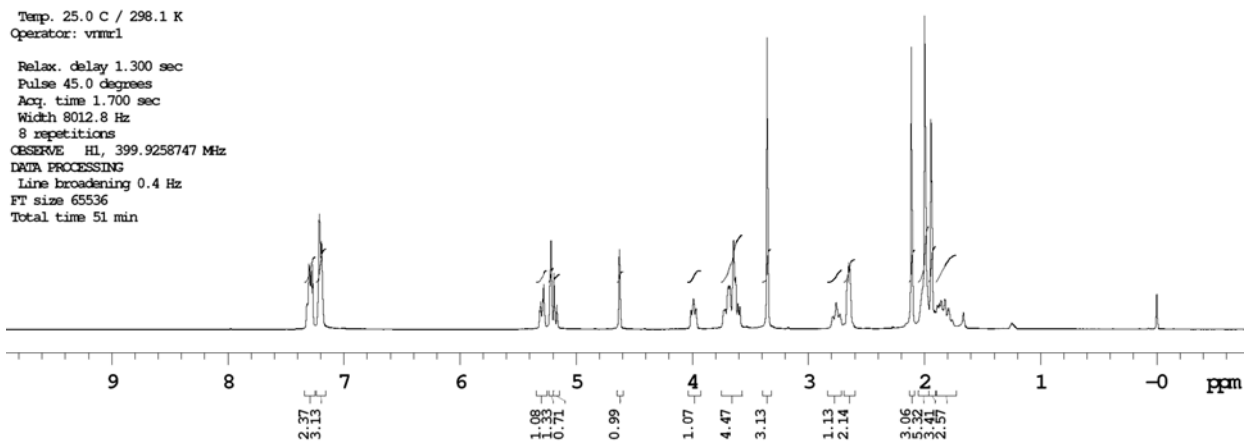

ADV-P-425-017  
 CD3 EXPERIMENT

Sample Name:

Data Collected on:  
 DZIRE400-vnmrs400  
 Archive directory:

Sample directory:

FidFile: Carbon

Pulse Sequence: Carbon (s2pul)  
 Solvent: cdcl3  
 Data collected on: Apr 14 2010

Temp. 25.0 C / 298.1 K  
 Operator: vnmr1

Relax. delay 2.000 sec  
 Pulse 45.0 degrees  
 Acq. time 1.300 sec  
 Width 24509.8 Hz  
 228 repetitions  
 OBSERVE C13, 100.5614066 MHz  
 DECOUPLE H1, 399.9278781 MHz  
 Power 40 dB  
 continuously on  
 WALTZ-16 modulated  
 DATA PROCESSING  
 Line broadening 1.0 Hz  
 FT size 65536  
 Total time 2 hr, 28 min

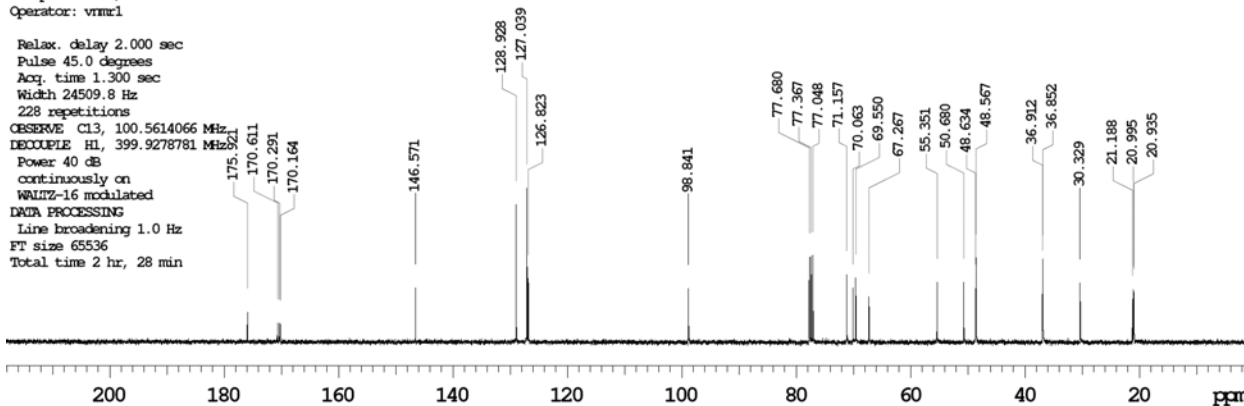

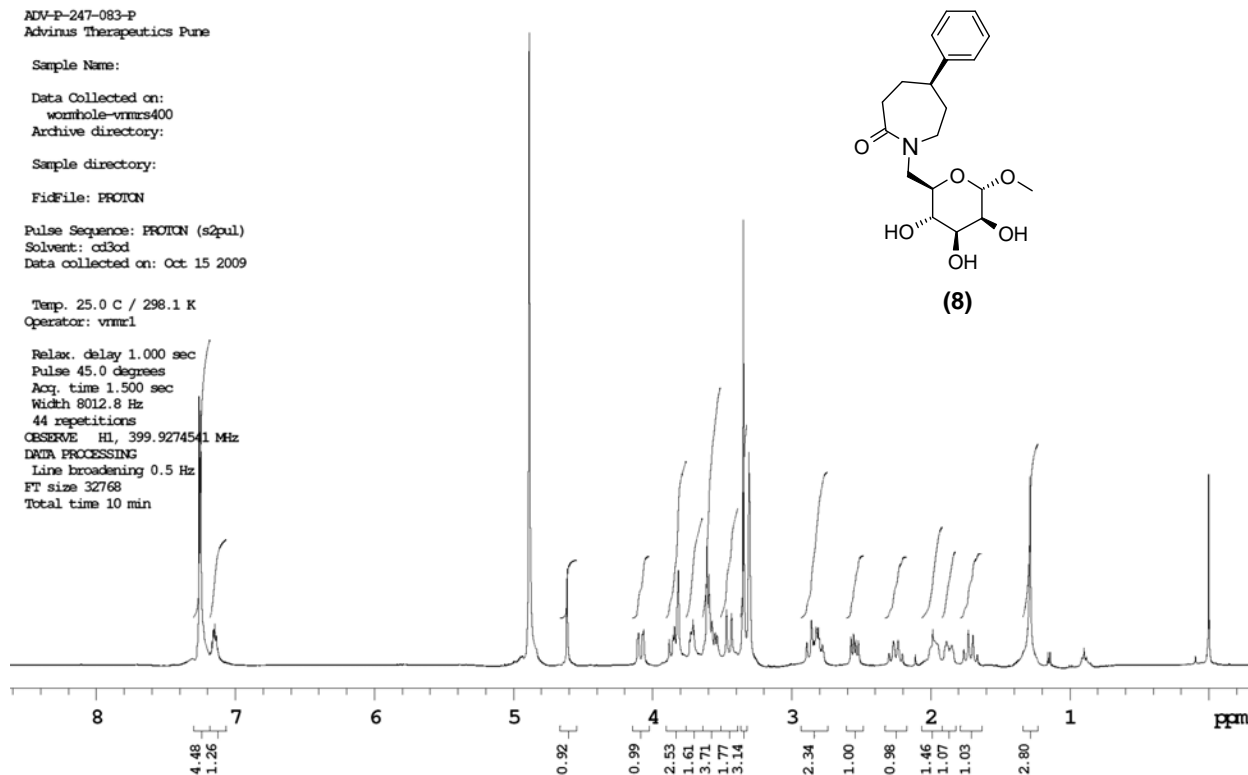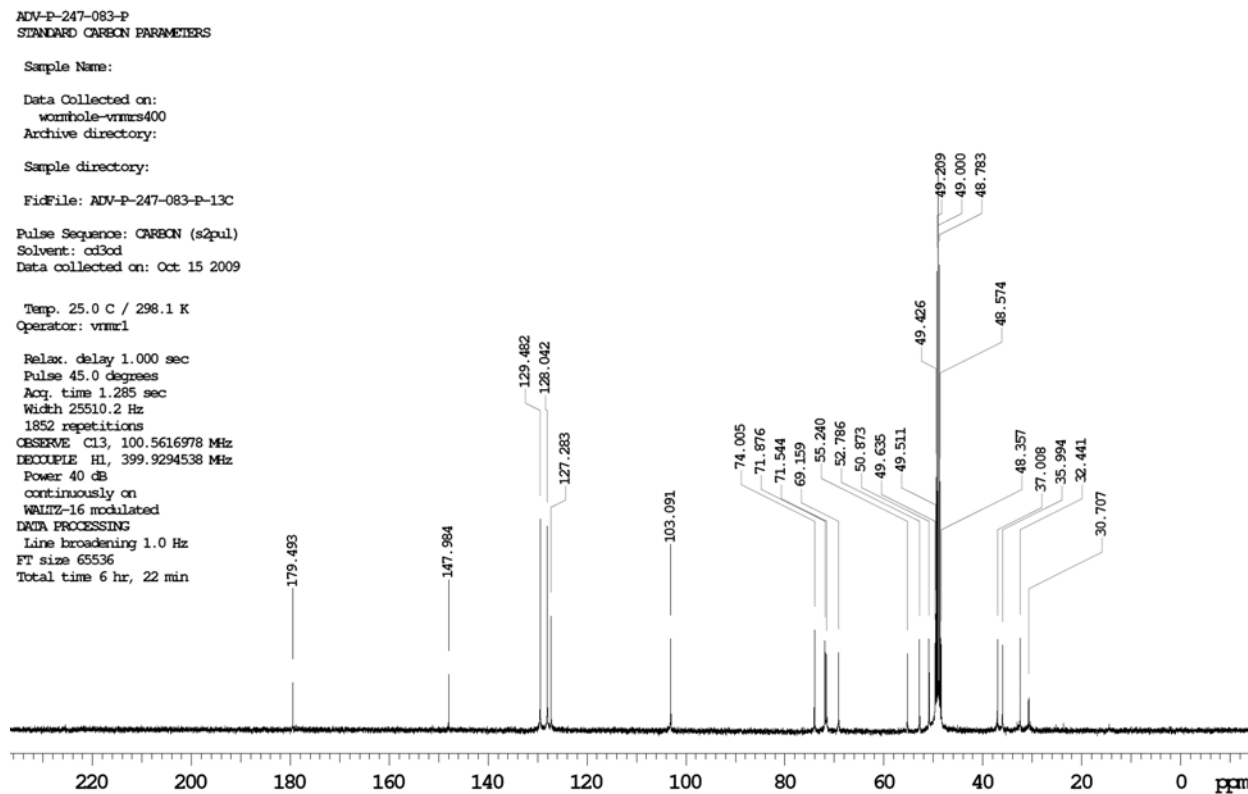

ADV-P-247-074-I  
 20 July 2009  
 Advinus Therapeutics Pune

File: Proton

Pulse Sequence: s2pul  
 Solvent: cd3od  
 Ambient temperature  
 Operator: vnm1  
 VNMR-400 "wormhole"

Relax. delay 1.300 sec  
 Pulse 45.0 degrees  
 Acq. time 1.700 sec  
 Width 8012.8 Hz  
 58 repetitions  
 OBSERVE H1, 399.9274541 MHz  
 DATA PROCESSING  
 Line broadening 0.4 Hz  
 FT size 65536  
 Total time 208 hr, 56 min, 22 sec

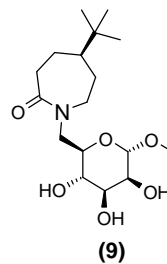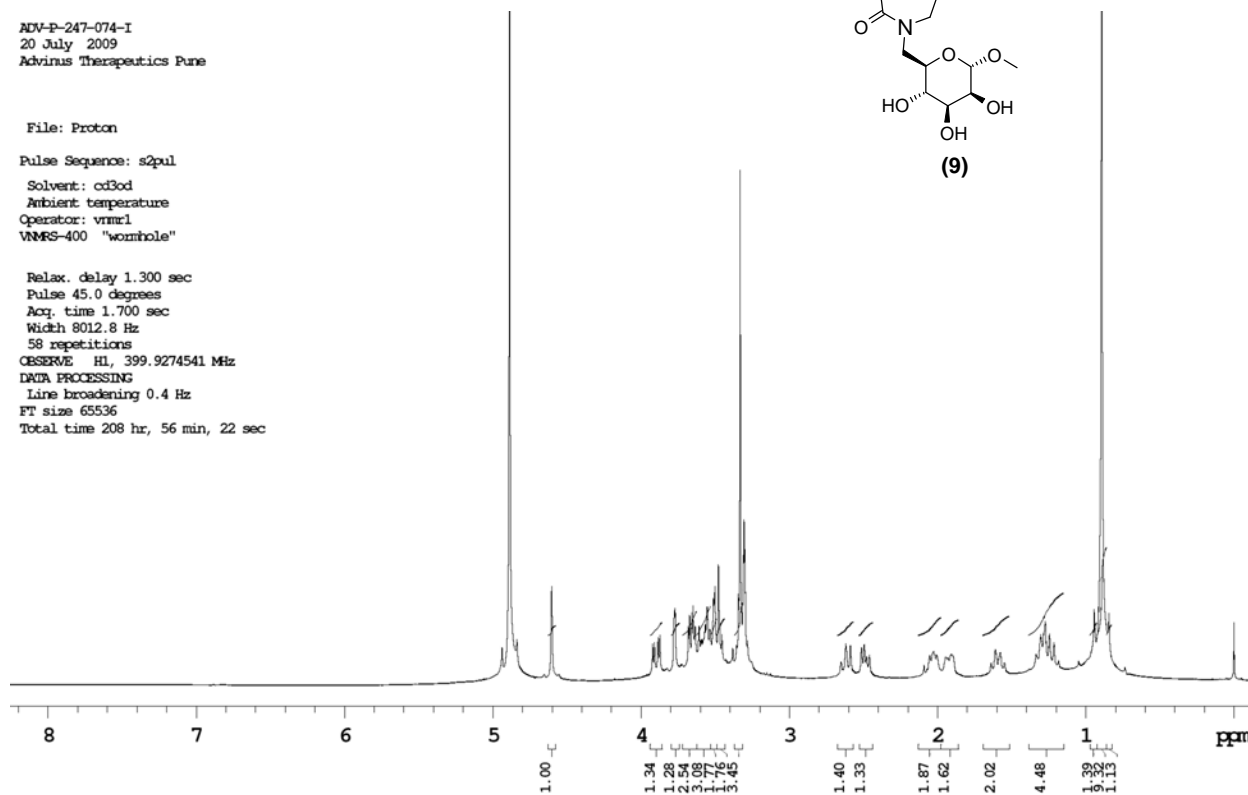

ADV-P-247-074-I  
 20 July 2009  
 C13 EXPERIMENT

Sample Name:

Archive directory:

Sample directory:

FidFile: ADV-P-247-074-I-C13

Pulse Sequence: Carbon (s2pul)  
 Solvent: cd3od  
 Data collected on: Jul 20 2009

Operator: vnm1  
 VNMR-400 "DZIRE400"

Relax. delay 1.000 sec  
 Pulse 45.0 degrees  
 Acq. time 1.300 sec  
 Width 24509.8 Hz  
 2352 repetitions  
 OBSERVE C13, 100.5616961 MHz  
 DECOUPLE H1, 399.9294541 MHz  
 Power 40 dB  
 continuously on  
 WALTZ-16 modulated  
 DATA PROCESSING  
 Line broadening 0.5 Hz  
 FT size 65536  
 Total time 1603 hr, 45 min

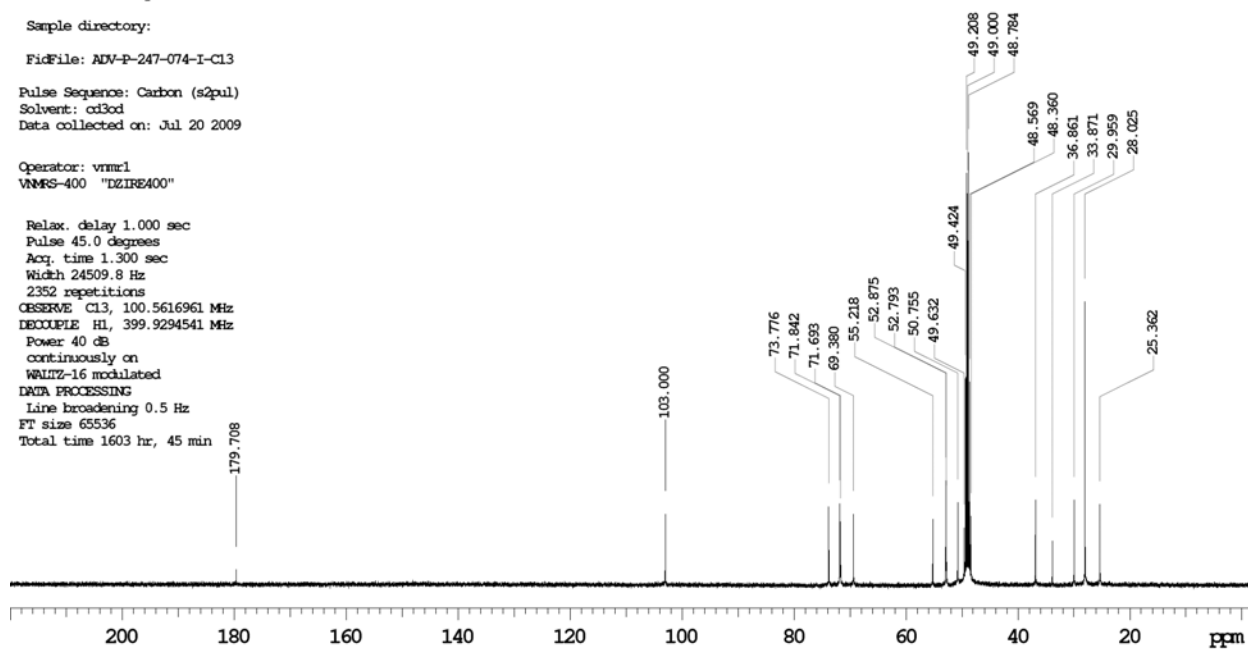

ADV-P-247-085-P  
ADVINUS THERAPEUTICS PUNE

Sample Name:

Data Collected on:  
DZIRE400-vnmrs400  
Archive directory:

Sample directory:

FidFile: PROTON

Pulse Sequence: PROTON (s2pul)  
Solvent: cd3od  
Data collected on: Mar 13 2010

Operator: vnmr1

Relax. delay 1.000 sec  
Pulse 45.0 degrees  
Acq. time 2.045 sec  
Width 8012.8 Hz  
9 repetitions  
OBSERVE H1, 399.9274541 MHz  
DATA PROCESSING  
FT size 32768  
Total time 26 min

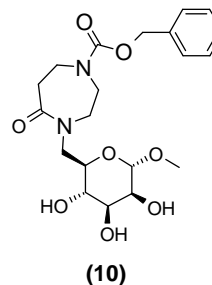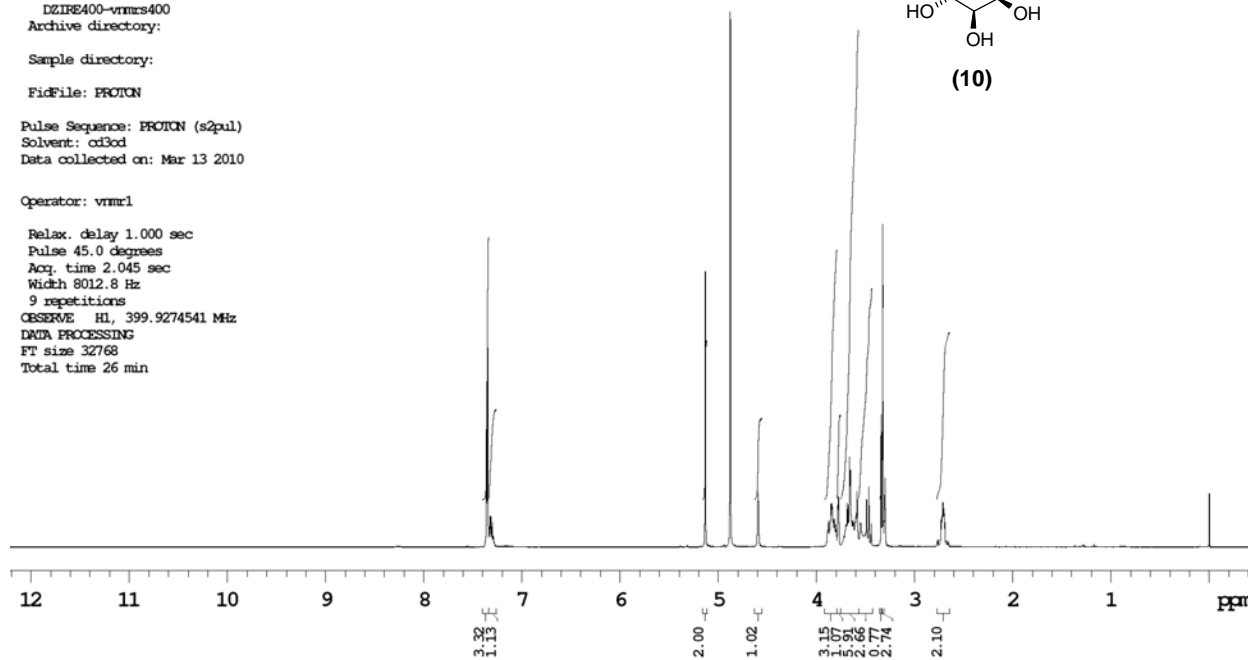

ADV-P-247-085-P  
C13 EXPERIMENT  
ADVINUS PUNE

Sample Name:

Data Collected on:  
DZIRE400-vnmrs400  
Archive directory:

Sample directory:

FidFile: ADV-P-247-085-P\_13C

Pulse Sequence: CARGON (s2pul)  
Solvent: cd3od  
Data collected on: Mar 13 2010

Operator: vnmr1

Relax. delay 1.000 sec  
Pulse 45.0 degrees  
Acq. time 1.285 sec  
Width 25510.2 Hz  
25000 repetitions  
OBSERVE C13, 100.5616970 MHz  
DECOUPLE H1, 399.9294538 MHz  
Power 40 dB  
continuously on  
WALTZ-16 modulated  
DATA PROCESSING  
Line broadening 1.0 Hz  
FT size 65536  
Total time 15 hr, 55 min

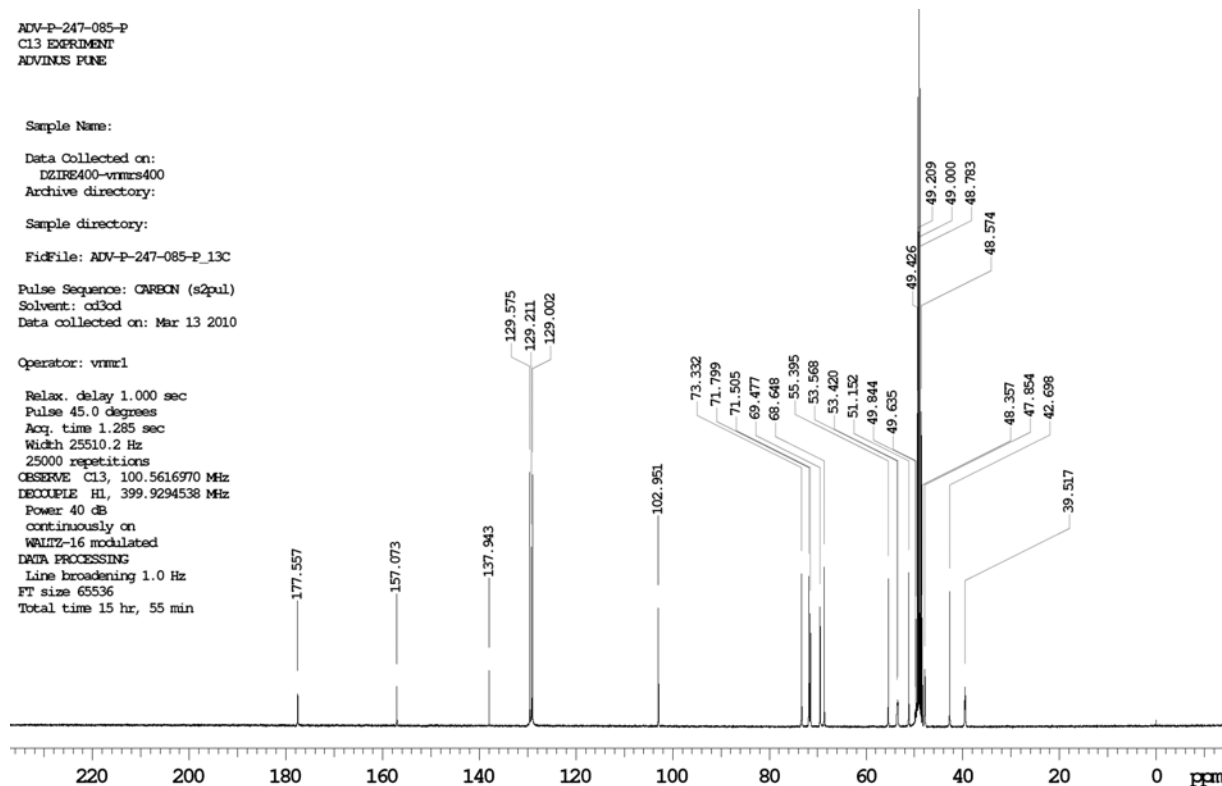

ADV-P-247-123  
06 October 2009  
Advirus Therapeutics Pune  
Sample Name:  
Data Collected on:  
womhole-vnmrs400  
Archive directory:  
Sample directory:  
FidFile: PROTON

Pulse Sequence: PROTON (s2pul)  
Solvent: cd3od  
Data collected on: Oct 6 2009

Temp. 25.0 C / 298.1 K  
Operator: vnmr1

Relax. delay 1.000 sec  
Pulse 45.0 degrees  
Acq. time 2.045 sec  
Width 8012.8 Hz  
48 repetitions  
OBSERVE H1, 399.9274537 MHz  
DATA PROCESSING  
Line broadening 0.5 Hz  
FT size 32768  
Total time 26 min

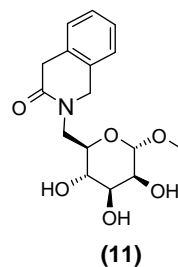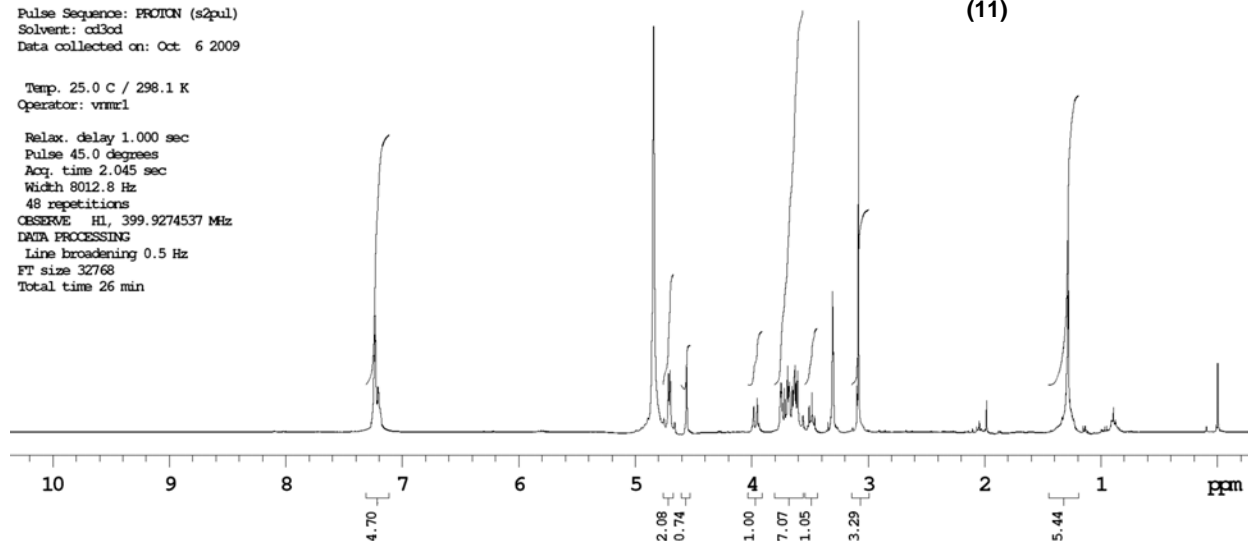

ADV-P-247-123  
STANDARD CARBON PARAMETERS

Sample Name:  
Data Collected on:  
womhole-vnmrs400  
Archive directory:  
Sample directory:  
FidFile: ADV-P-247-123-13C

Pulse Sequence: CARBON (s2pul)  
Solvent: cd3od  
Data collected on: Oct 5 2009

Temp. 25.0 C / 298.1 K  
Operator: vnmr1

Relax. delay 4.000 sec  
Pulse 45.0 degrees  
Acq. time 1.285 sec  
Width 25510.2 Hz  
8976 repetitions  
OBSERVE C13, 100.5616947 MHz  
DECOUPLE H1, 399.9294538 MHz  
Power 40 dB  
continuously on  
WALTZ-16 modulated  
DATA PROCESSING  
Line broadening 1.0 Hz  
FT size 65536  
Total time 29 hr, 24 min

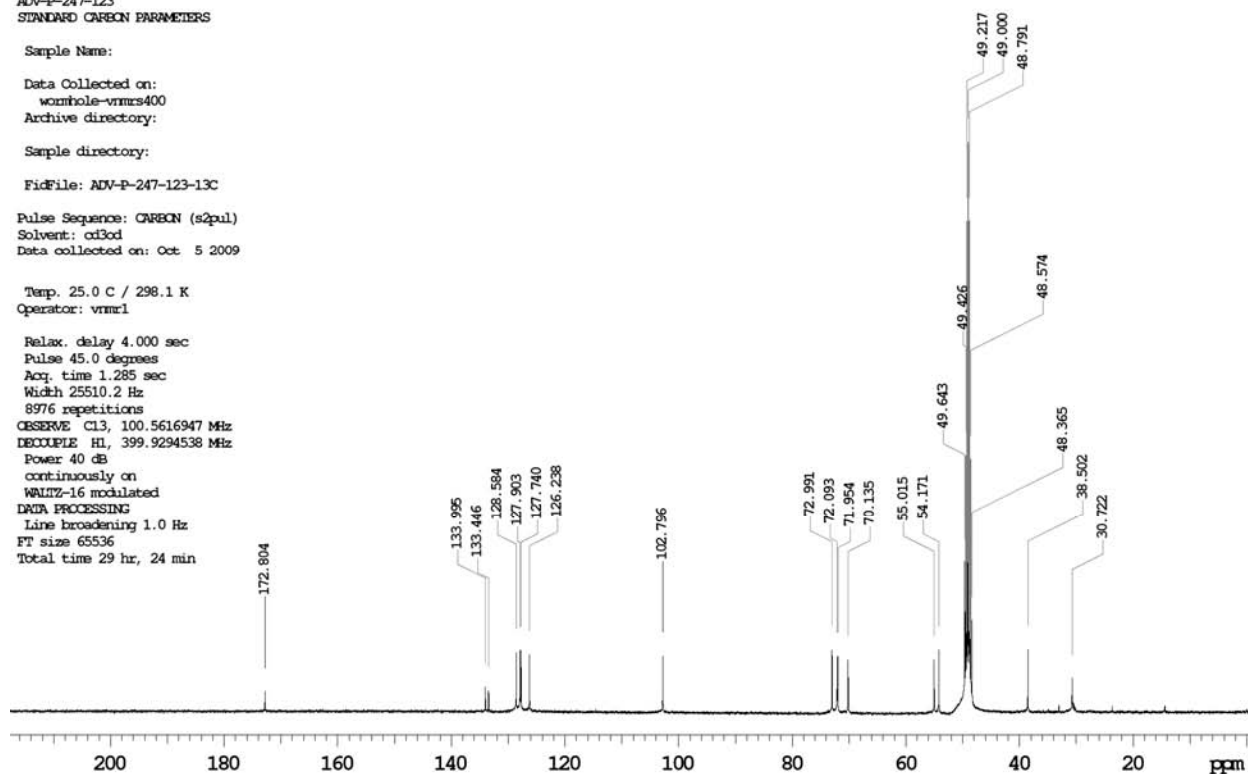

ADV-P-247-071-A  
09 OCT 2009  
ADVINUS THERAPEUTICS PUNE

Sample Name:

Data Collected on:  
womhole-vrms400  
Archive directory:

Sample directory:

FidFile: Proton

Pulse Sequence: Proton (s2pul)  
Solvent: dmsc  
Data collected on: Oct 9 2009

Temp. 20.4 C / 293.6 K  
Operator: vrmc1

Relax. delay 0.500 sec  
Pulse 45.0 degrees  
Acq. time 1.700 sec  
Width 7225.4 Hz  
80 repetitions  
OBSERVE H1, 399.9277700 MHz  
DATA PROCESSING  
Line broadening 0.3 Hz  
FT size 65536  
Total time 9 min 25 sec

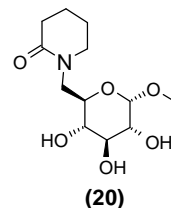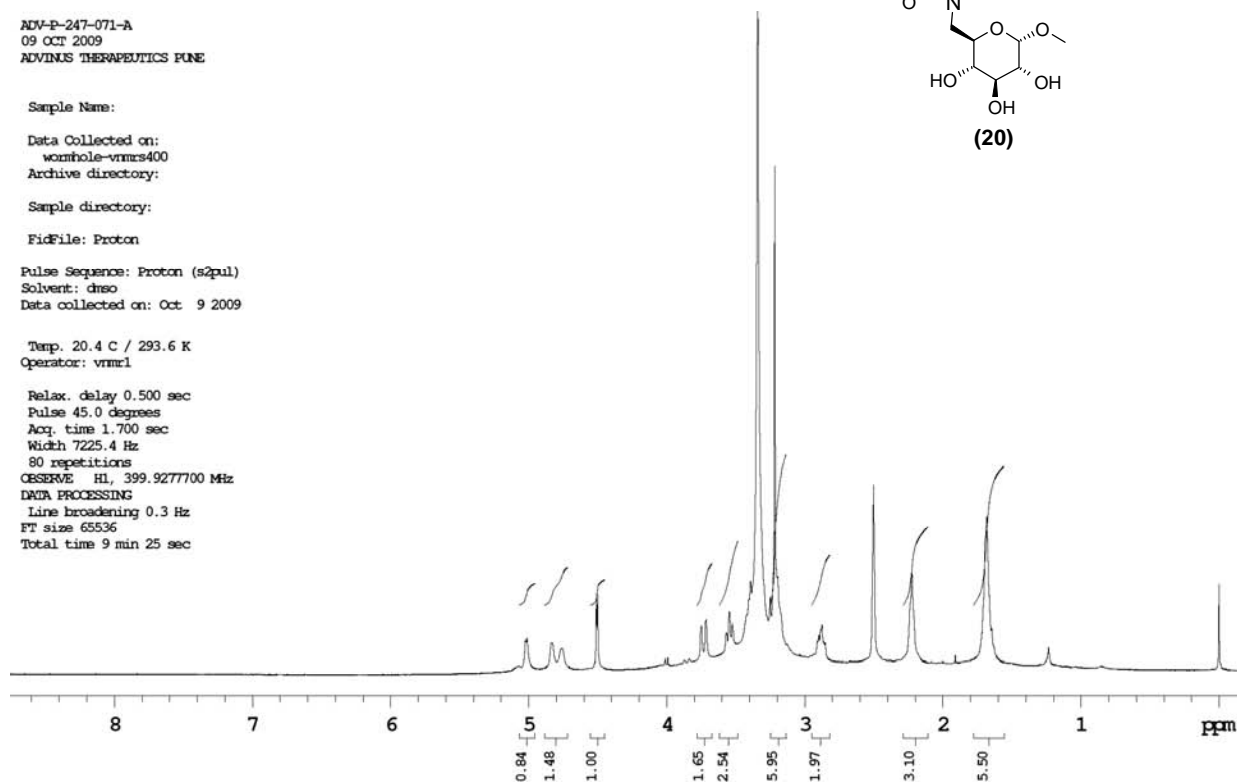

ADV-P-247-077  
20 July 2009  
C13 EXPERIMENT

Sample Name:

Archive directory:

Sample directory:

FidFile: ADV-P-247-077-C13

Pulse Sequence: Carbon (s2pul)  
Solvent: dmsc  
Data collected on: Jul 24 2009

Operator: vrmc1  
VMRS-400 "DZIRE400"

Relax. delay 1.000 sec  
Pulse 45.0 degrees  
Acq. time 1.300 sec  
Width 24509.8 Hz  
1720 repetitions  
OBSERVE C13, 100.5619722 MHz  
DECOUPLE H1, 399.9297780 MHz  
Power 40 dB  
continuously on  
WALTZ-16 modulated  
DATA PROCESSING  
Line broadening 0.5 Hz  
FT size 65536  
Total time 1603 hr, 45 min

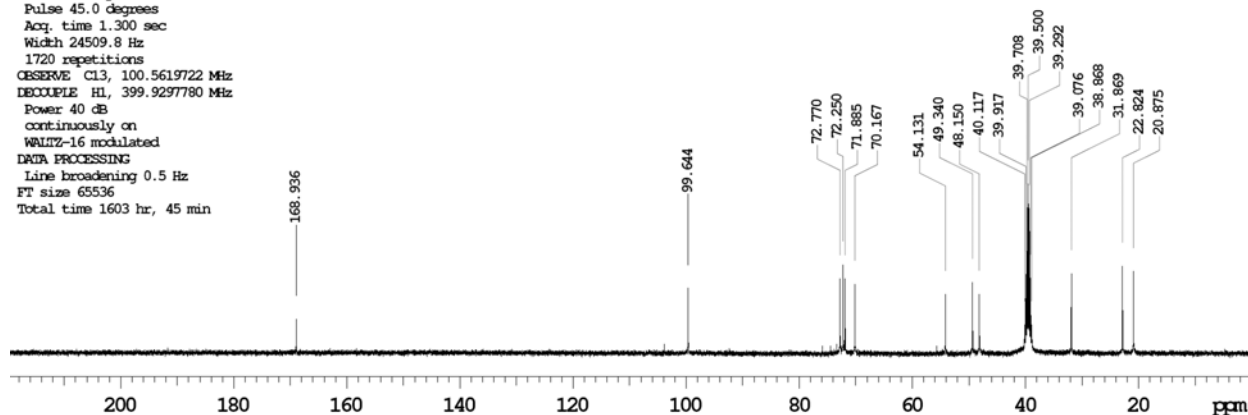

ADV-P-247-115-B  
Advinus Therapeutics Pune

Sample Name:

Data Collected on:  
DZIRE400-vrms400  
Archive directory:

Sample directory:

FidFile: Proton

Pulse Sequence: Proton (s2pul)  
Solvent: cd3od  
Data collected on: Apr 8 2010

Operator: vrmr1

Relax. delay 1.300 sec  
Pulse 45.0 degrees  
Acq. time 1.700 sec  
Width 8012.8 Hz  
104 repetitions  
OBSERVE H1, 399.9274541 MHz  
DATA PROCESSING  
Line broadening 0.4 Hz  
FT size 65536  
Total time 51 min

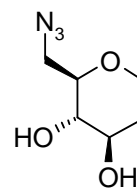

(13)

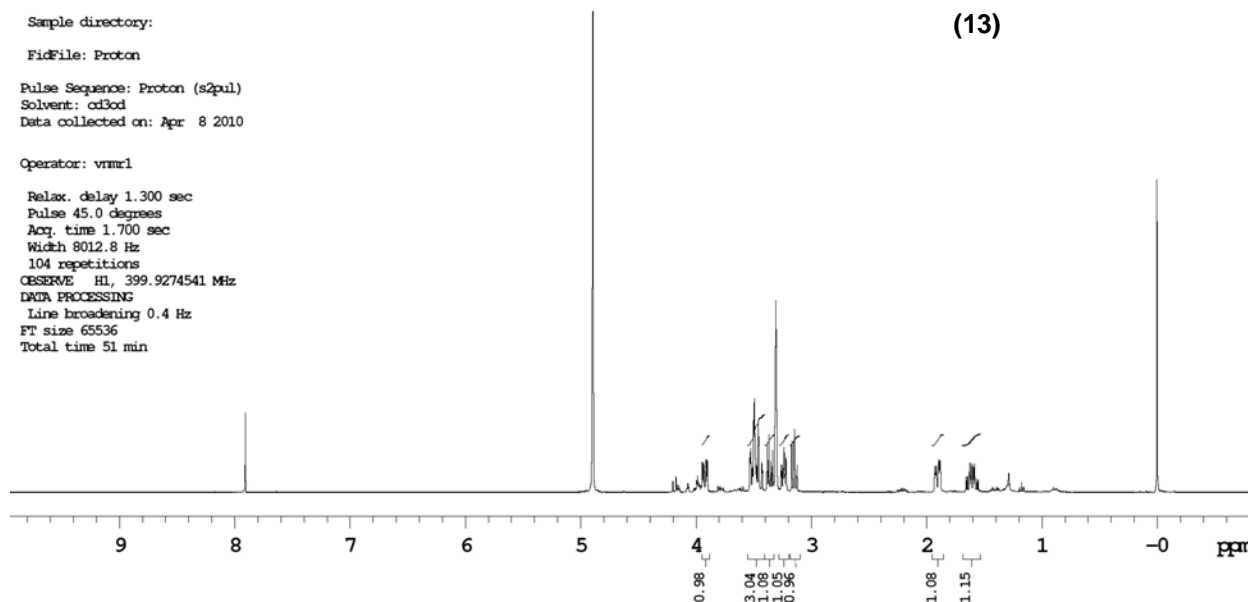

ADV-P-247-115-B-13C  
18 September 2009  
C13 EXPERIMENT

Sample Name:

Data Collected on:  
wormhole-vrms400  
Archive directory:

Sample directory:

FidFile: ADV-P-247-115-B-C13

Pulse Sequence: Carbon (s2pul)  
Solvent: cd3od  
Data collected on: Sep 18 2009

Temp. 25.0 C / 298.1 K  
Operator: vrmr1

Relax. delay 2.000 sec  
Pulse 45.0 degrees  
Acq. time 1.300 sec  
Width 24509.8 Hz  
25000 repetitions  
OBSERVE C13, 100.5616988 MHz  
DECOUPLE H1, 399.9294538 MHz  
Power 40 dB  
continuously on  
WALTZ-16 modulated  
DATA PROCESSING  
Line broadening 1.0 Hz  
FT size 65536  
Total time 22 hr, 58 min

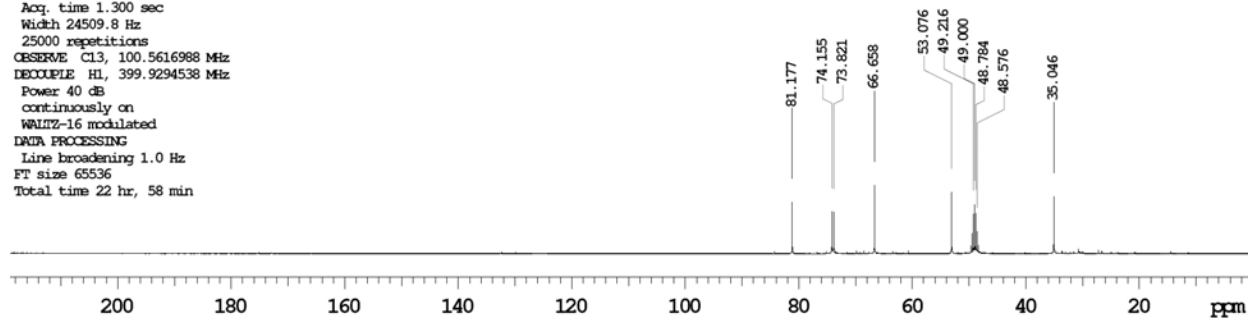



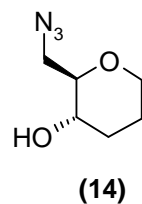

ADV-P-247-115-A  
16 September 2009  
Advinus pune

Sample Name:

Data Collected on:  
wormhole-vrms400  
Archive directory:

Sample directory:

FidFile: PROTON

Pulse Sequence: PROTON (s2pul)  
Solvent: cd3od  
Data collected on: Sep 18 2009

Temp. 20.9 C / 294.1 K  
Operator: vrm1

Relax. delay 1.000 sec  
Pulse 45.0 degrees  
Acq. time 2.049 sec  
Width 8012.8 Hz  
64 repetitions  
OBSERVE H1, 399.9274541 MHz  
DATA PROCESSING  
Line broadening 0.3 Hz  
FT size 65536  
Total time 21 hr, 13 min

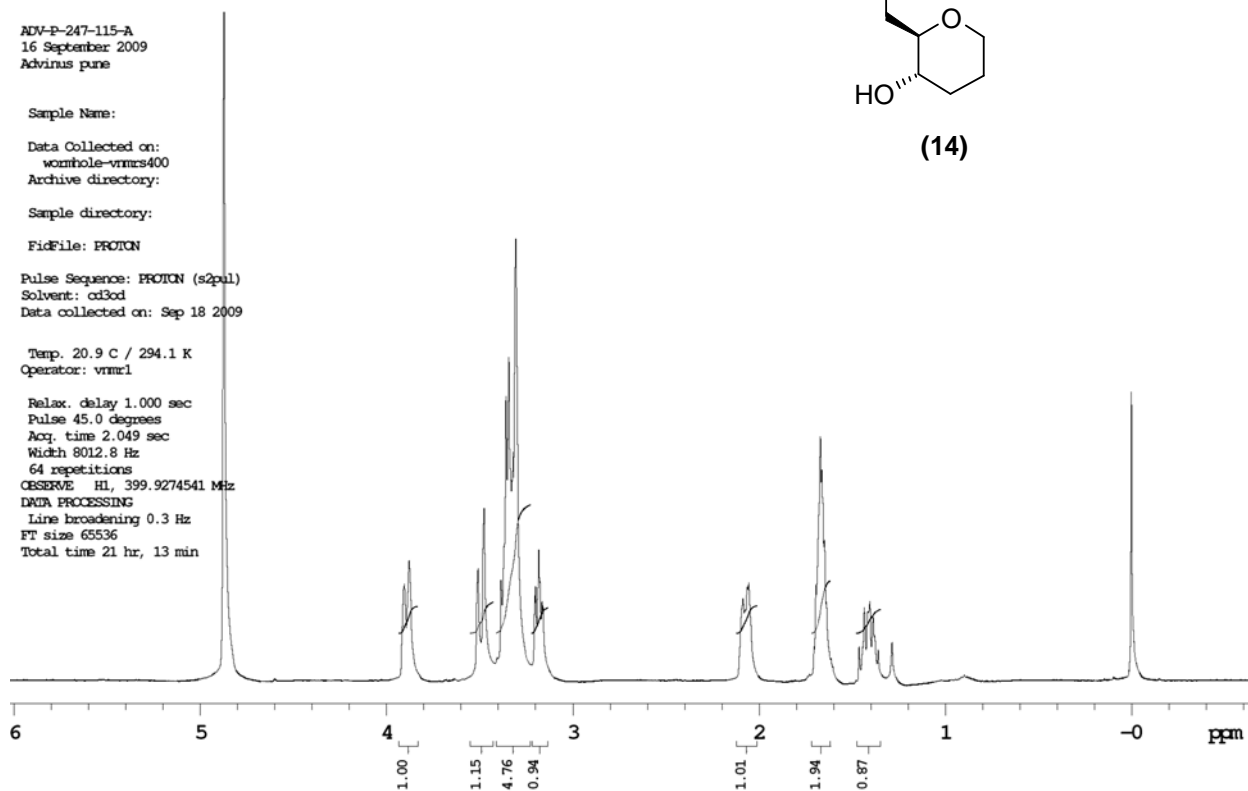

ADV-P-247-115-A-13C  
18 September 2009  
C13 EXPERIMENT

Sample Name:

Data Collected on:  
wormhole-vrms400  
Archive directory:

Sample directory:

FidFile: ADV-P-247-115-A-13C

Pulse Sequence: Carbon (s2pul)  
Solvent: cd3od  
Data collected on: Sep 18 2009

Temp. 25.0 C / 298.1 K  
Operator: vrm1

Relax. delay 2.000 sec  
Pulse 45.0 degrees  
Acq. time 1.300 sec  
Width 24509.8 Hz  
44 repetitions  
OBSERVE C13, 100.5616988 MHz  
DECOUPLE H1, 399.9294538 MHz  
Power 40 dB  
continuously on  
WALTZ-16 modulated  
DATA PROCESSING  
Line broadening 1.0 Hz  
FT size 65536  
Total time 22 hr, 58 min

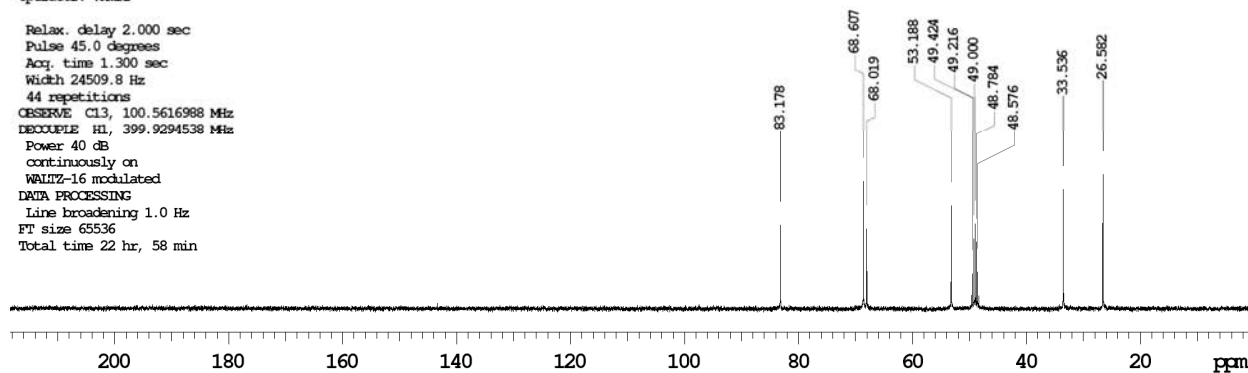

ADV-P-247-117-A  
01 Oct 2009  
Advirus Therapeutics Pune

Sample Name:  
C-01158-080  
Data Collected on:  
wormhole-vnmrs400  
Archive directory:

Sample directory:

FidFile: PROTON

Pulse Sequence: PROTON (s2pul)  
Solvent: cd3od  
Data collected on: Oct 1 2009

Temp. 21.0 C / 294.1 K  
Operator: vnmr1

Relax. delay 0.500 sec  
Pulse 45.0 degrees  
Acq. time 1.700 sec  
Width 7622.0 Hz  
148 repetitions  
OBSERVE H1, 399.9274541 MHz  
DATA PROCESSING  
Line broadening 0.3 Hz  
FT size 65536  
Total time 15 hr, 20 min

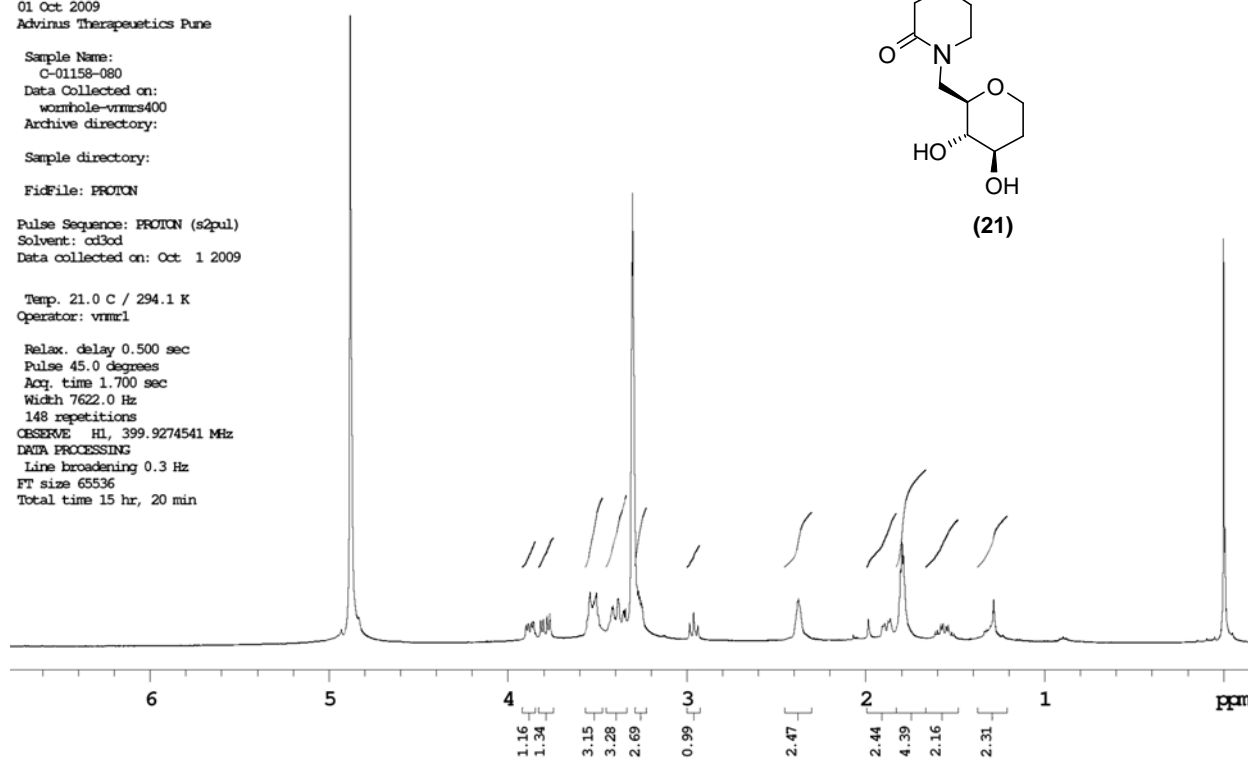

ADV-P-247-117A  
26 September 2009  
C13 EXPERIMENT

Sample Name:

Data Collected on:  
wormhole-vnmrs400  
Archive directory:

Sample directory:

FidFile: ADV-P-247-117-A-13C

Pulse Sequence: Carbon (s2pul)  
Solvent: cd3od  
Data collected on: Sep 26 2009

Temp. 25.0 C / 298.1 K  
Operator: vnmr1

Relax. delay 2.000 sec  
Pulse 45.0 degrees  
Acq. time 1.300 sec  
Width 24509.8 Hz  
868 repetitions  
OBSERVE C13, 100.5616973 MHz  
DECOUPLE H1, 399.9294538 MHz  
Power 40 dB  
continuously on  
WALTZ-16 modulated  
DATA PROCESSING  
Line broadening 1.0 Hz  
FT size 65536  
Total time 22 hr, 58 min

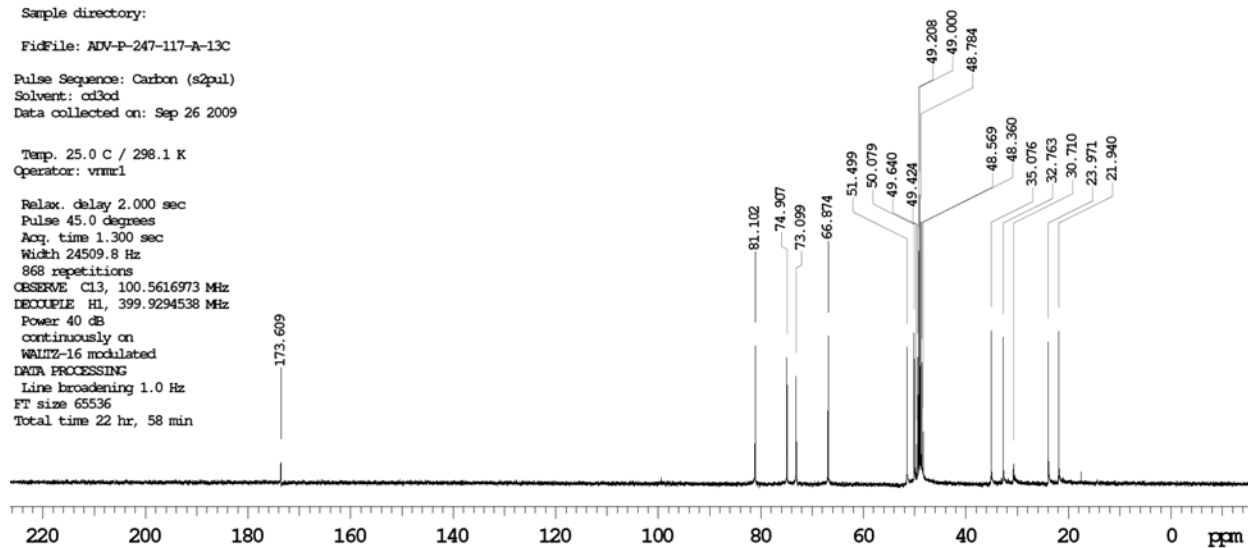

ADV-P-247-116  
01 Oct 2009  
Advinus Therapeutics Pune

Sample Name:  
C-01158-080  
Data Collected on:  
wormhole-vrms400  
Archive directory:

Sample directory:

FidFile: PROTON

Pulse Sequence: PROTON (s2pul)  
Solvent: cdcl3  
Data collected on: Oct 1 2009

Temp. 20.4 C / 293.6 K  
Operator: vrml

Relax. delay 0.500 sec  
Pulse 45.0 degrees  
Acq. time 1.700 sec  
Width 7622.0 Hz  
40 repetitions  
OBSERVE H1, 399.9258784 MHz  
DATA PROCESSING  
Line broadening 0.3 Hz  
FT size 65536  
Total time 15 hr, 20 min

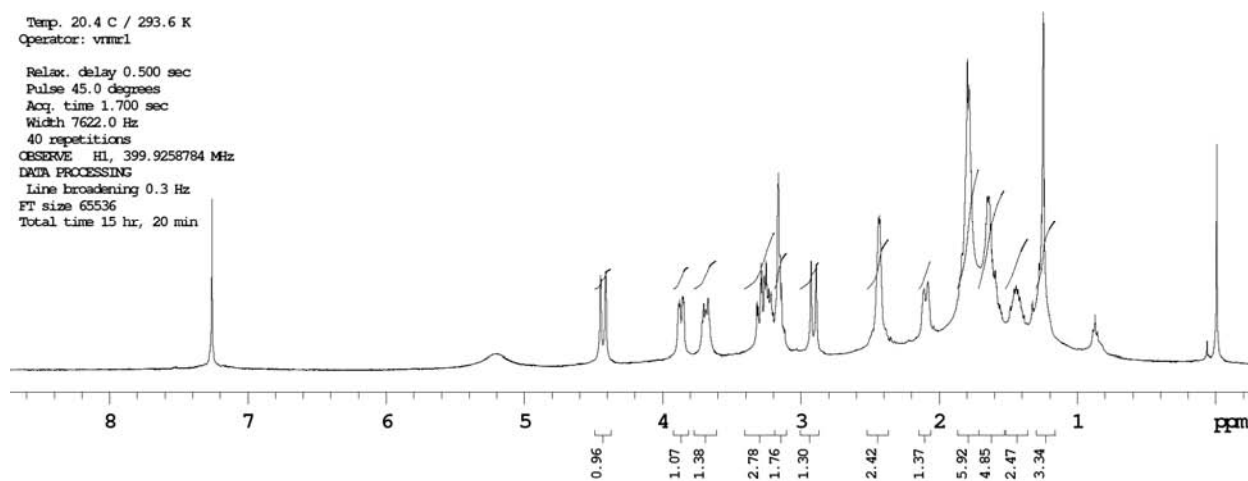

ADV-P-247-116  
30 September 2009  
C13 EXPERIMENT

Sample Name:

Data Collected on:  
wormhole-vrms400  
Archive directory:

Sample directory:

FidFile: ADV-P-247-116-C13

Pulse Sequence: Carbon (s2pul)  
Solvent: cdcl3  
Data collected on: Sep 30 2009

Temp. 25.0 C / 298.1 K  
Operator: vrml

Relax. delay 2.000 sec  
Pulse 45.0 degrees  
Acq. time 1.300 sec  
Width 24509.8 Hz  
16800 repetitions  
OBSERVE C13, 100.5614051 MHz  
DECOUPLE H1, 399.9278781 MHz  
Power 40 dB  
continuously on  
WALTZ-16 modulated  
DATA PROCESSING  
Line broadening 1.0 Hz  
FT size 65536  
Total time 22 hr, 58 min

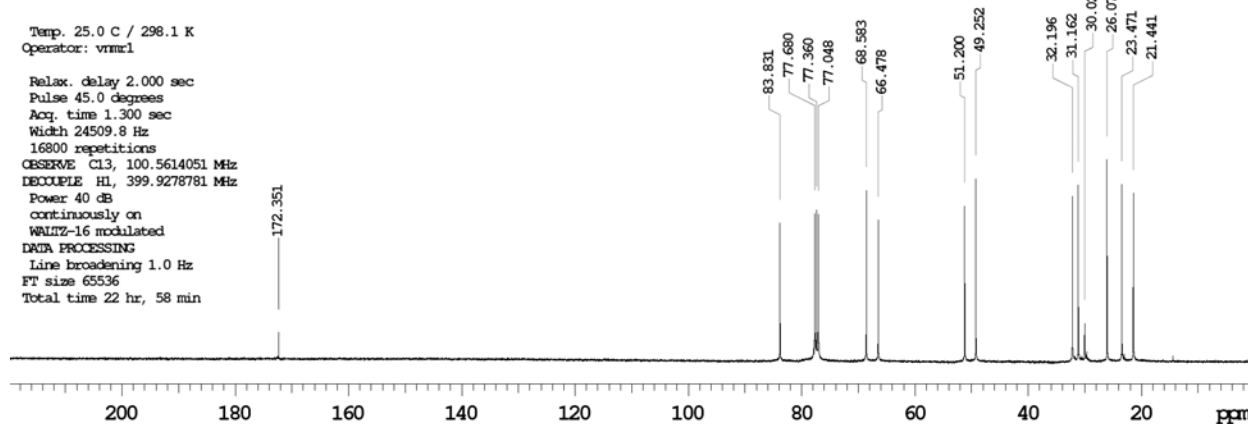

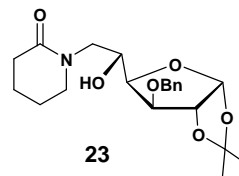

ADV-P-247-122A  
 05 October 2009  
 Advirus Therapeutics Pune  
 Sample Name:  
 Data Collected on:  
 womhole-vnmrs400  
 Archive directory:  
 Sample directory:  
 FidFile: PROTON  
 Pulse Sequence: PROTON (s2pul)  
 Solvent: cd3od  
 Data collected on: Oct 5 2009  
 Temp. 25.0 C / 298.1 K  
 Operator: vnmr1  
 Relax. delay 1.000 sec  
 Pulse 45.0 degrees  
 Acq. time 2.045 sec  
 Width 8012.8 Hz  
 32 repetitions  
 OBSERVE H1, 399.9274541 MHz  
 DATA PROCESSING  
 Line broadening 0.5 Hz  
 FT size 32768  
 Total time 26 min

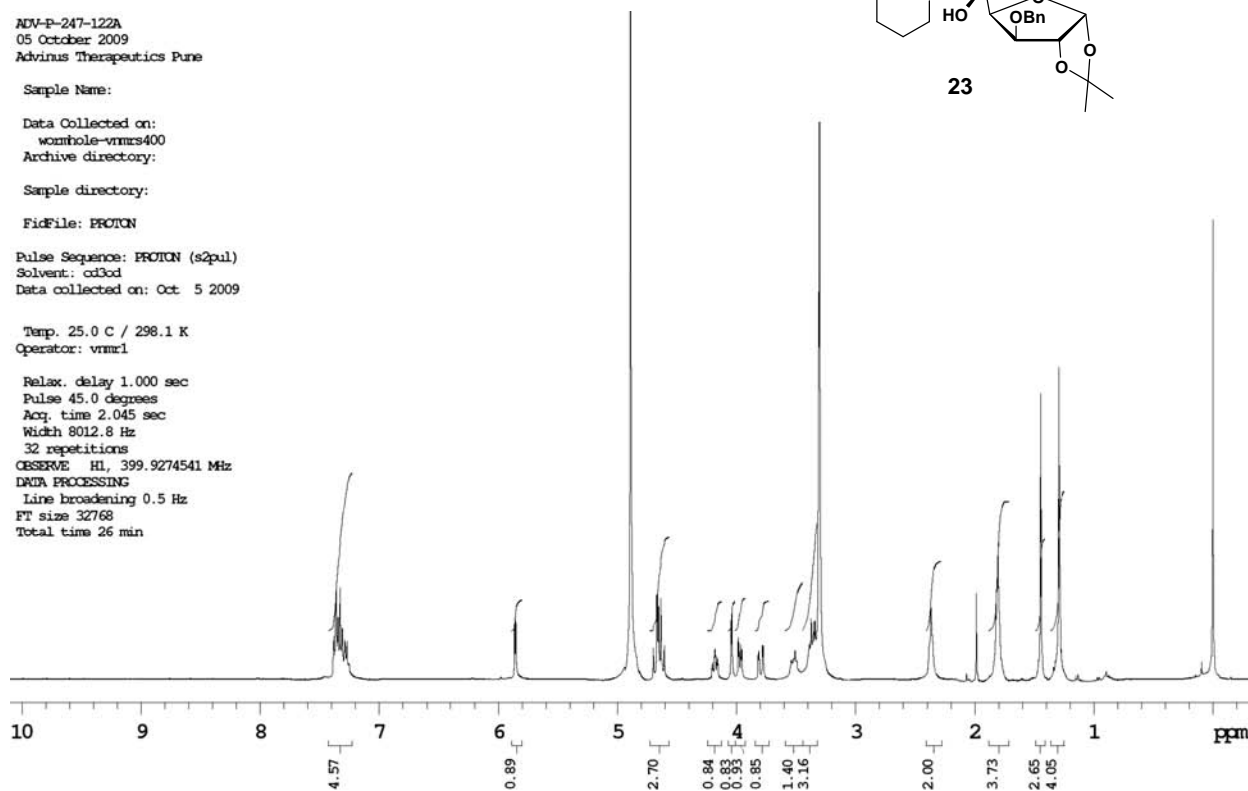

ADV-P-247-122A  
 STANDARD CARBON PARAMETERS  
 Sample Name:  
 Data Collected on:  
 womhole-vnmrs400  
 Archive directory:  
 Sample directory:  
 FidFile: ADV-P-247-122A-13C  
 Pulse Sequence: CARBON (s2pul)  
 Solvent: cd3od  
 Data collected on: Oct 5 2009  
 Temp. 25.0 C / 298.1 K  
 Operator: vnmr1  
 Relax. delay 4.000 sec  
 Pulse 45.0 degrees  
 Acq. time 1.285 sec  
 Width 25510.2 Hz  
 732 repetitions  
 OBSERVE C13, 100.5616963 MHz  
 DECOUPLE H1, 399.9294538 MHz  
 Power 40 dB  
 continuously on  
 WALTZ-16 modulated  
 DATA PROCESSING  
 Line broadening 1.0 Hz  
 FT size 65536  
 Total time 14 hr, 42 min

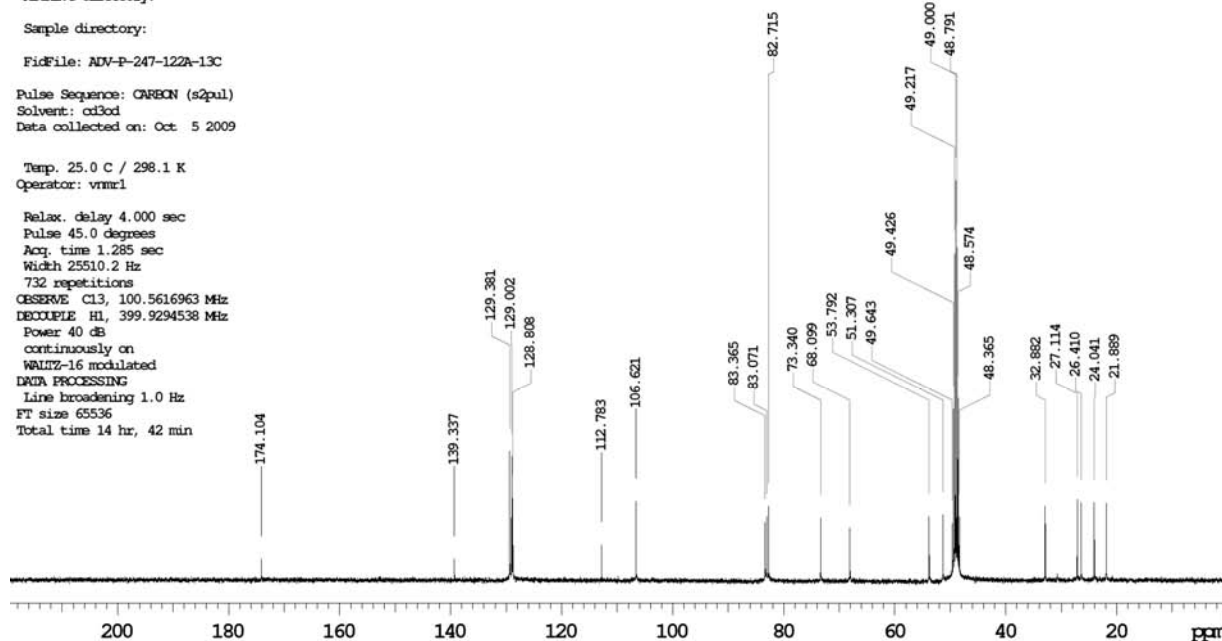

ADV-P-247-191  
ADVINS FUNE  
-  
Sample Name:  
Data Collected on:  
DZIRE400-vnmrs400  
Archive directory:  
Sample directory:  
FidFile: Proton  
Pulse Sequence: Proton (s2pul)  
Solvent: cd3od  
Data collected on: Mar 26 2010  
Temp. 21.1 C / 294.2 K  
Operator: vnmr1  
Relax. delay 1.300 sec  
Pulse 45.0 degrees  
Acq. time 1.700 sec  
Width 8012.8 Hz  
52 repetitions  
OBSERVE H1, 399.9274541 MHz  
DATA PROCESSING  
Line broadening 0.4 Hz  
FT size 65536  
Total time 12 min

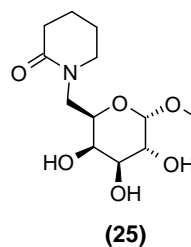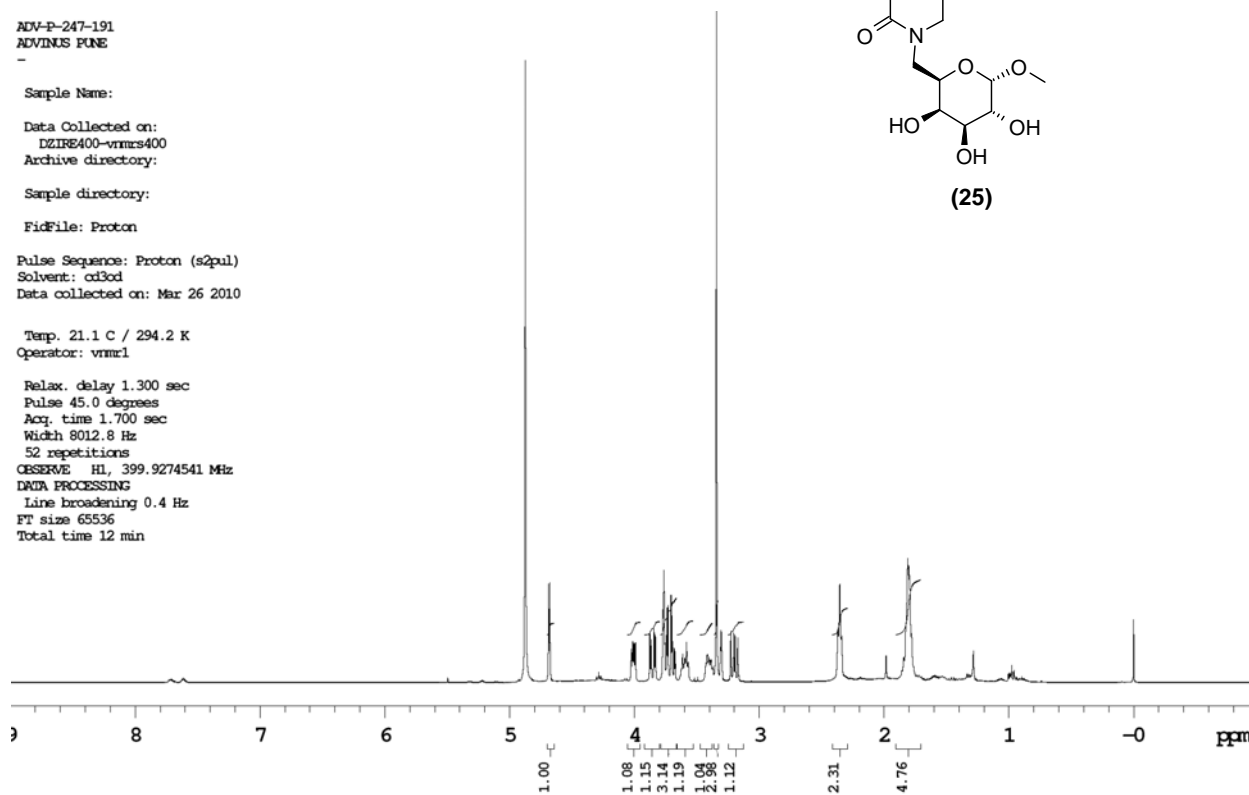

ADV-P-247-191  
13C Experiment  
Sample Name:  
Data Collected on:  
DZIRE400-vnmrs400  
Archive directory:  
Sample directory:  
FidFile: CARBON  
Pulse Sequence: CARBON (s2pul)  
Solvent: cd3od  
Data collected on: Mar 26 2010

Operator: vnmr1  
Relax. delay 1.000 sec  
Pulse 45.0 degrees  
Acq. time 1.285 sec  
Width 25510.2 Hz  
64 repetitions  
OBSERVE C13, 100.5617041 MHz  
DECOUPLE H1, 399.9294538 MHz  
Power 36 dB  
continuously on  
WALTZ-16 modulated  
DATA PROCESSING  
Line broadening 0.5 Hz  
FT size 65536  
Total time 15 hr, 55 min

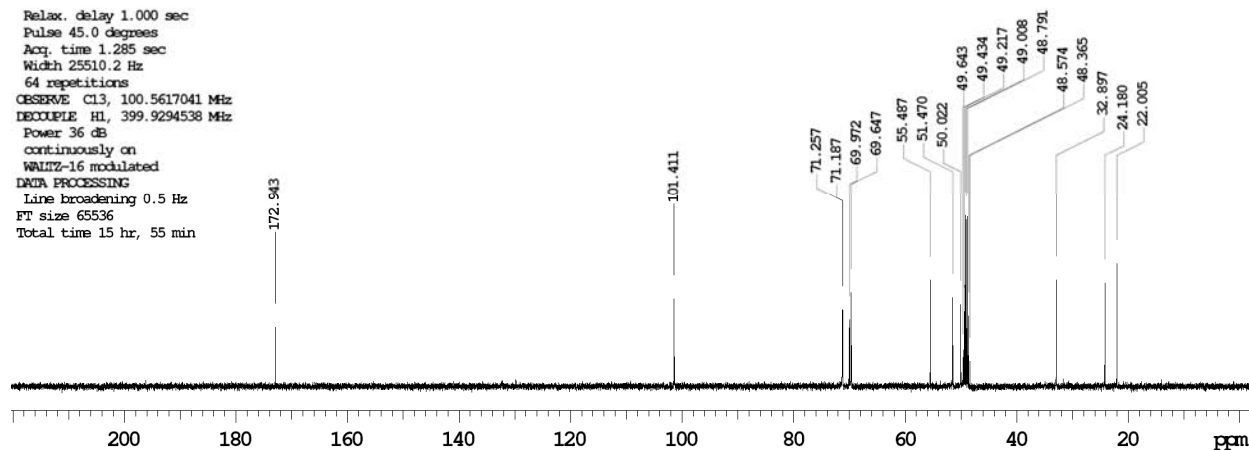

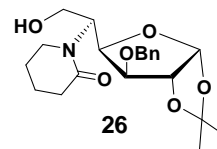

ADV-P-418-085-P  
 Advinus Therapeutics Pune

Sample Name:

Data Collected on:  
 DZIRE400-vnmrs400  
 Archive directory:

Sample directory:

FidFile: Proton

Pulse Sequence: Proton (s2pul)  
 Solvent: cd3od  
 Data collected on: Sep 13 2010

Temp. 20.8 C / 293.9 K  
 Operator: vnmr1

Relax. delay 1.300 sec  
 Pulse 45.0 degrees  
 Acq. time 1.700 sec  
 Width 8012.8 Hz  
 76 repetitions  
 OBSERVE HI, 399.9274541 MHz  
 DATA PROCESSING  
 Line broadening 0.4 Hz  
 FT size 65536  
 Total time 51 min

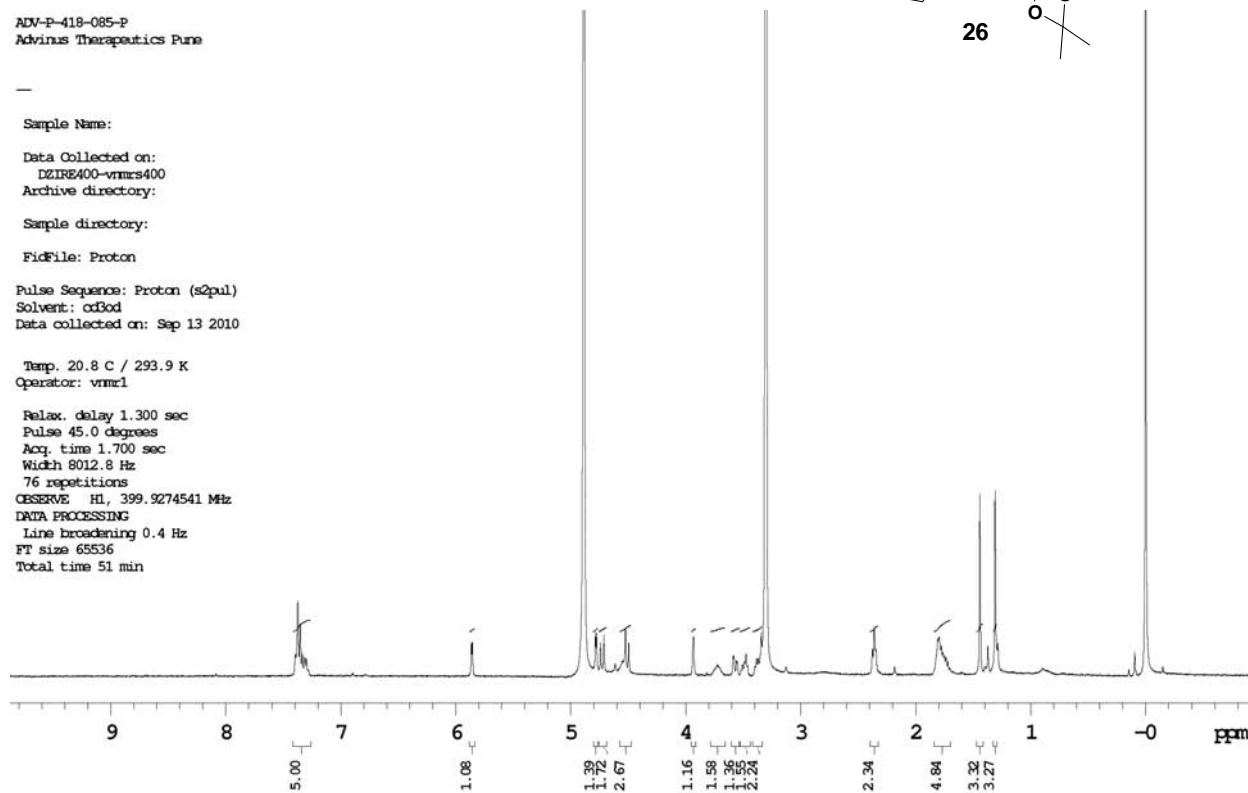

ADV-P-418-085-P\_13C  
 13C Experiment

Sample Name:

Data Collected on:  
 DZIRE400-vnmrs400  
 Archive directory:

Sample directory:

FidFile: CARBON

Pulse Sequence: CARBON (s2pul)  
 Solvent: cd3od  
 Data collected on: Sep 7 2010

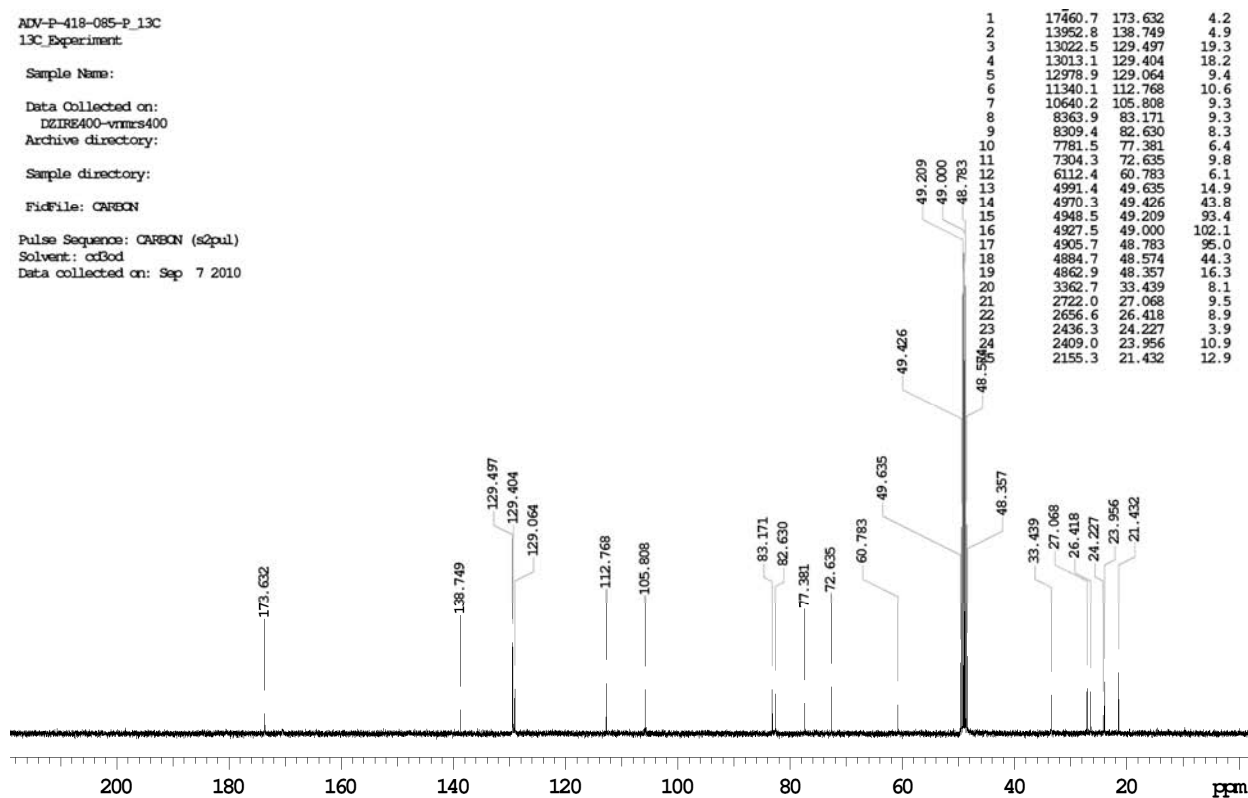

ADV-TRNG-06-030-A  
16 July 2009  
Advirus Therapeutics Pune

Sample Name:  
Archive directory:  
Sample directory:  
FidFile: ADV-TRNG-06-030-A  
Pulse Sequence: Proton (s2pul)  
Solvent: cdcl3  
Data collected on: Jul 16 2009

Operator: vnmr1  
VNMR-400 "DZIRE400"  
Relax. delay 1.300 sec  
Pulse 45.0 degrees  
Acq. time 1.700 sec  
Width 8012.8 Hz  
36 repetitions  
OBSERVE HL, 399.9258772 MHz  
DATA PROCESSING  
Line broadening 0.4 Hz  
FT size 65536  
Total time 51 min

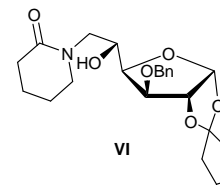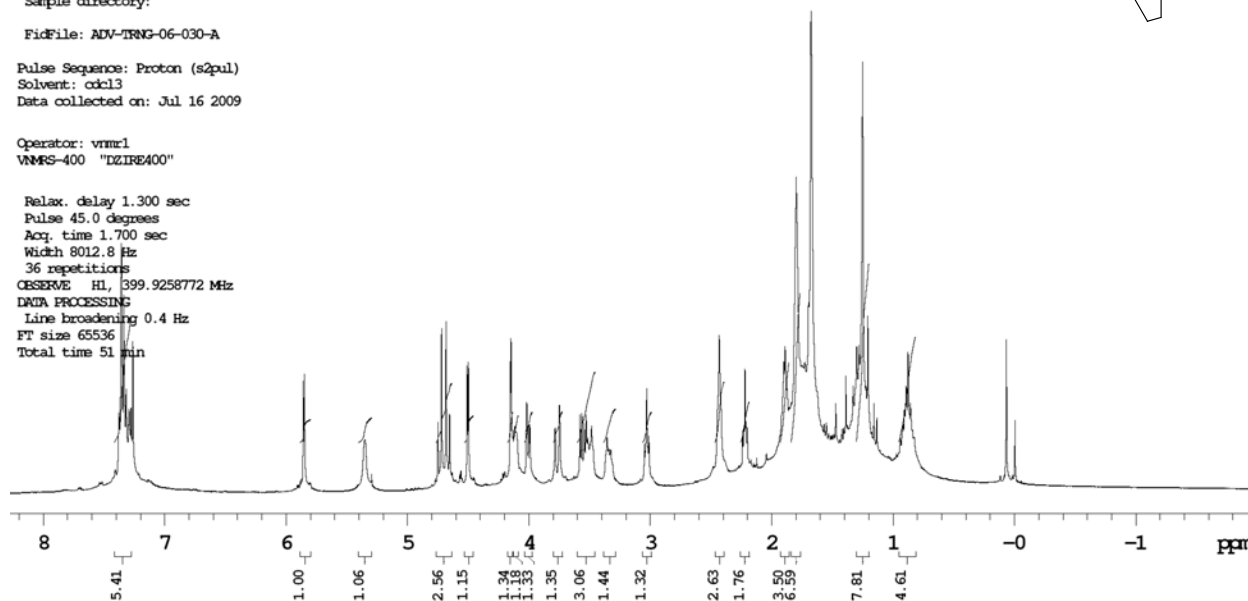

399

ADV-TRNG-06-030-A  
16 July 2009  
C13 EXPERIMENT

Sample Name:  
Archive directory:  
Sample directory:  
FidFile: ADV-TRNG-060-030-A-C13  
Pulse Sequence: Carbon (s2pul)  
Solvent: cdcl3  
Data collected on: Jul 16 2009

Operator: vnmr1  
VNMR-400 "DZIRE400"  
Relax. delay 1.000 sec  
Pulse 45.0 degrees  
Acq. time 1.300 sec  
Width 24509.8 Hz  
23576 repetitions  
OBSERVE C13, 100.5614055 MHz  
DECOUPLE HL, 399.9278784 MHz  
Power 40 dB  
continuously on  
WALTZ-16 modulated  
DATA PROCESSING  
Line broadening 0.5 Hz  
FT size 65536  
Total time 160 hr, 22 min

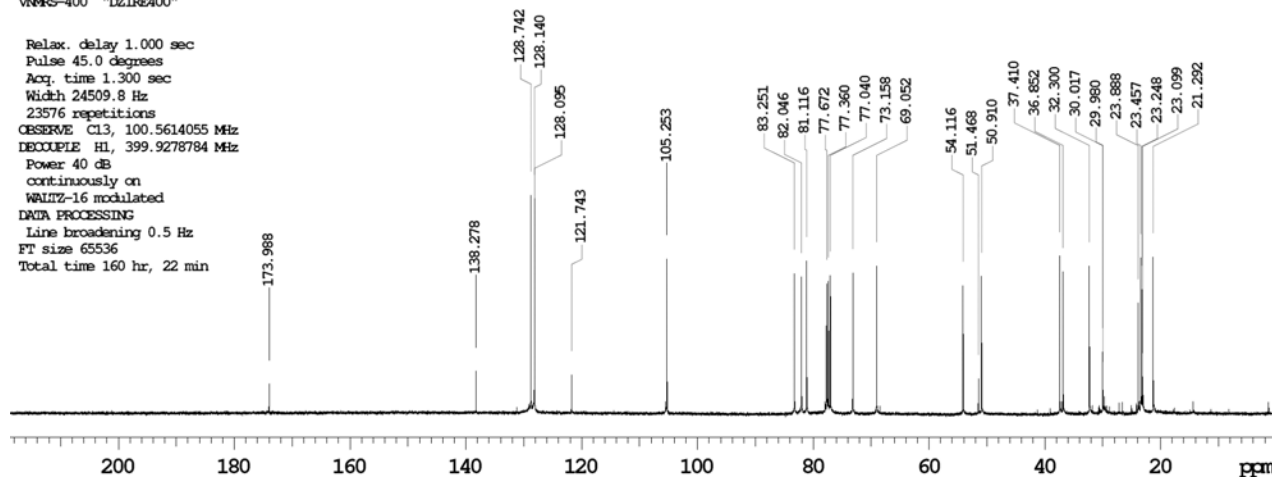

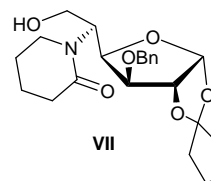

ADV-P-418-085-NP  
 Advinus Therapeutics Pune

Sample Name:  
 Data Collected on:  
 DZIRE400-vrms400  
 Archive directory:  
 Sample directory:  
 FidFile: Proton  
 Pulse Sequence: Proton (s2pul)  
 Solvent: cd3od  
 Data collected on: Sep 13 2010  
 Operator: vrml  
 Relax. delay 1.300 sec  
 Pulse 45.0 degrees  
 Acq. time 1.700 sec  
 Width 8012.8 Hz  
 3 repetitions  
 OBSERVE H1, 399.9274311 Mhz  
 DATA PROCESSING  
 Line broadening 0.4 Hz  
 FT size 65536  
 Total time 51 min

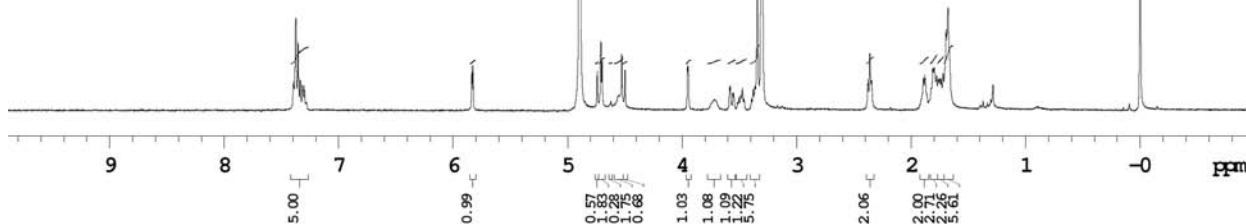

ADV-P-418-085-NP  
 13C Experiment

Sample Name:  
 Data Collected on:  
 DZIRE400-vrms400  
 Archive directory:  
 Sample directory:  
 FidFile: CARBON  
 Pulse Sequence: CARBON (s2pul)  
 Solvent: cd3od  
 Data collected on: Sep 9 2010

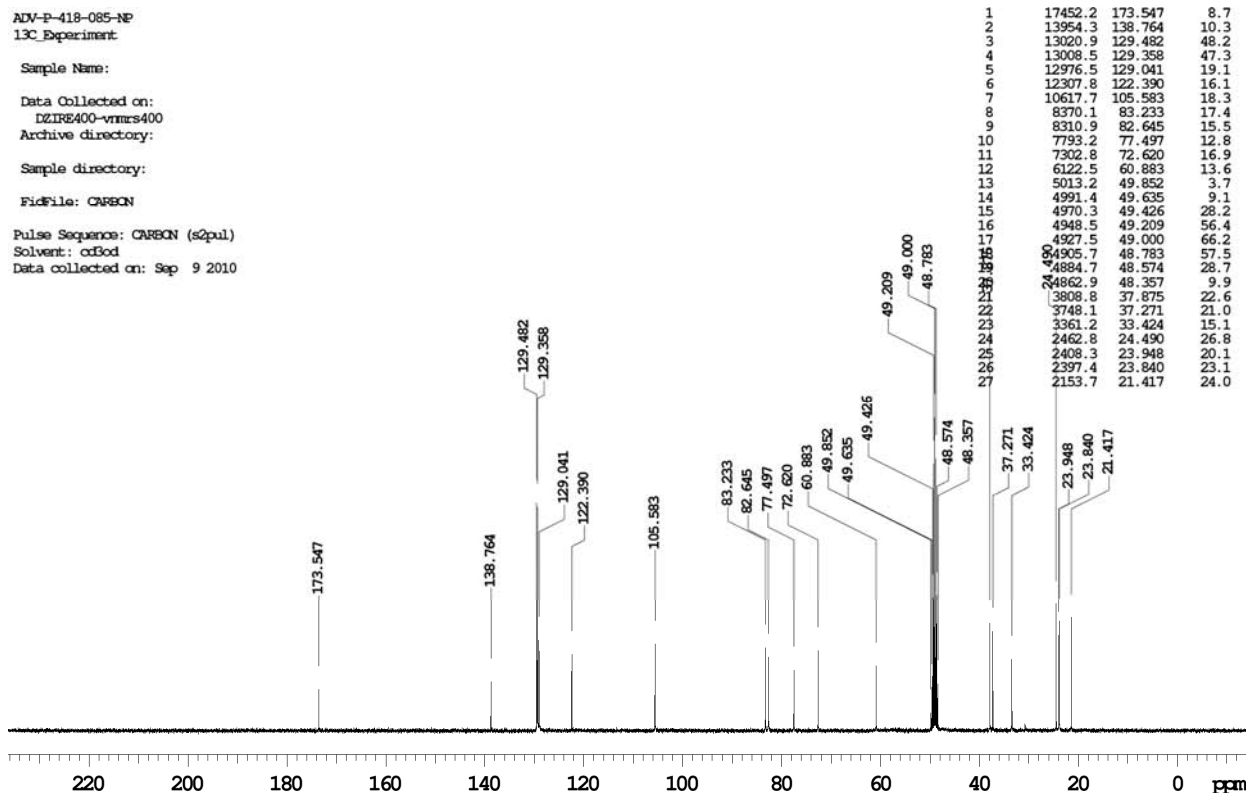



ADV-P-247-178-02  
 Advinus pune

Sample Name:

Data Collected on:  
 DZIRE400-vnmrs400  
 Archive directory:

Sample directory:

FidFile: PROTON

Pulse Sequence: PROTON (s2pul)  
 Solvent: cdcl3  
 Data collected on: Mar 2 2010

Temp. 20.3 C / 293.4 K  
 Operator: vnmr1

Relax. delay 1.000 sec  
 Pulse 45.0 degrees  
 Acq. time 2.049 sec  
 Width 8012.8 Hz  
 40 repetitions  
 OBSERVE H1, 399.9259676 MHz  
 DATA PROCESSING  
 Line broadening 0.5 Hz  
 FT size 65536  
 Total time 21 hr, 13 min

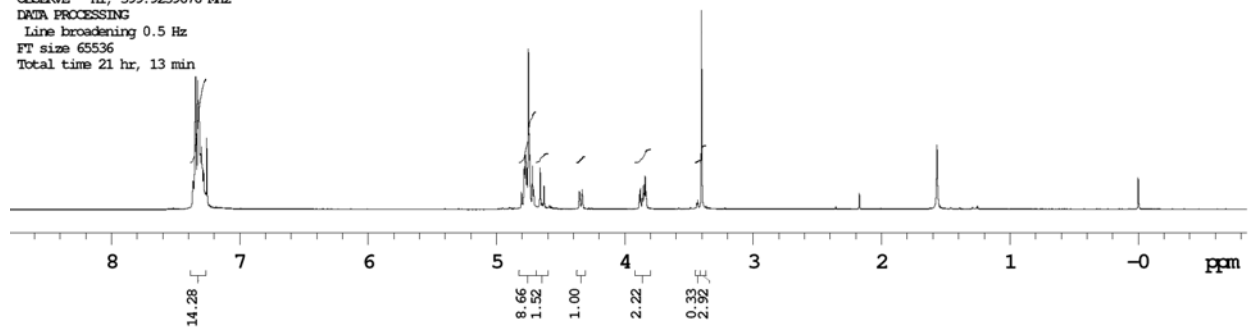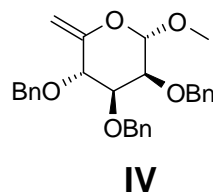

ADV-P-247-178-02  
 C13 EXPERIMENT  
 ADVINUS PUNE

Sample Name:

Data Collected on:  
 DZIRE400-vnmrs400  
 Archive directory:

Sample directory:

FidFile: ADV-P-247-178-02\_13C

Pulse Sequence: CARBON (s2pul)  
 Solvent: cdcl3  
 Data collected on: Mar 5 2010

Operator: vnmr1

Relax. delay 1.000 sec  
 Pulse 45.0 degrees  
 Acq. time 1.285 sec  
 Width 25510.2 Hz  
 7472 repetitions  
 OBSERVE C13, 100.5614216 MHz  
 DECOUPLE H1, 399.9278781 MHz  
 Power 40 dB  
 continuously on  
 WALTZ-16 modulated  
 DATA PROCESSING  
 Line broadening 1.0 Hz  
 FT size 65536  
 Total time 17 hr, 12 min

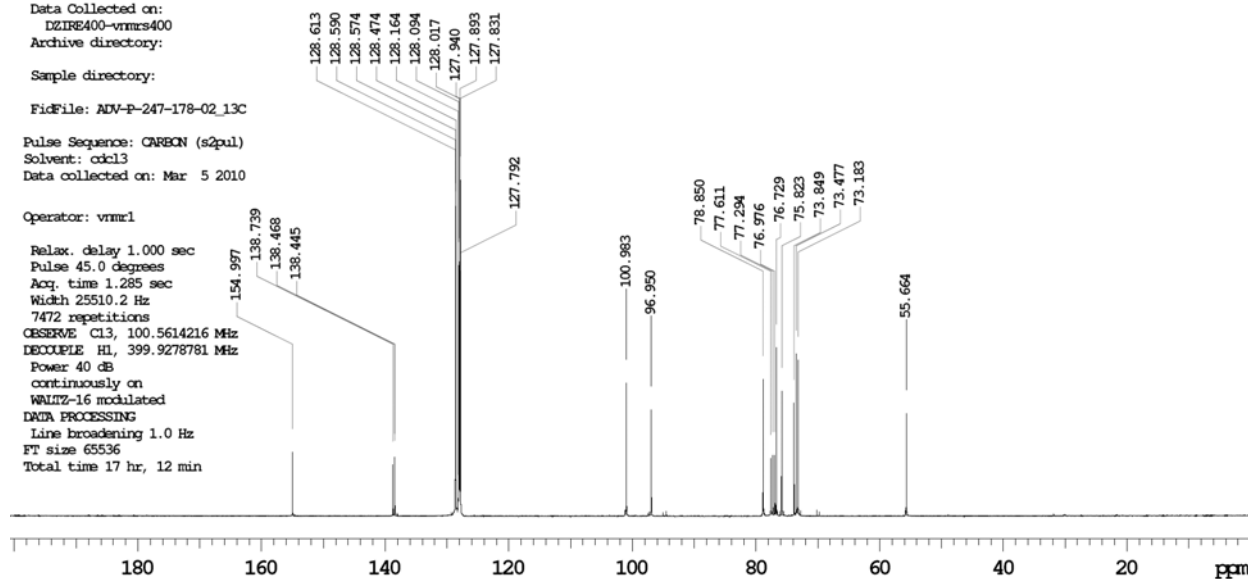

ADV-P-247-178-01  
 ADVINUS FUNE

Sample Name:

Data Collected on:  
 DZIRE400-vrms400  
 Archive directory:

Sample directory:

FidFile: PROTON

Pulse Sequence: PROTON (s2pul)  
 Solvent: cdcl3  
 Data collected on: Mar 9 2010

Operator: vmr1

Relax. delay 1.000 sec  
 Pulse 45.0 degrees  
 Acq. time 2.049 sec  
 Width 8012.8 Hz  
 56 repetitions  
 OBSERVE H1, 399.9258933 MHz  
 DATA PROCESSING  
 Line broadening 0.5 Hz  
 FT size 65536  
 Total time 21 hr, 13 min

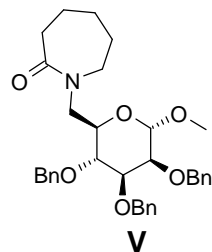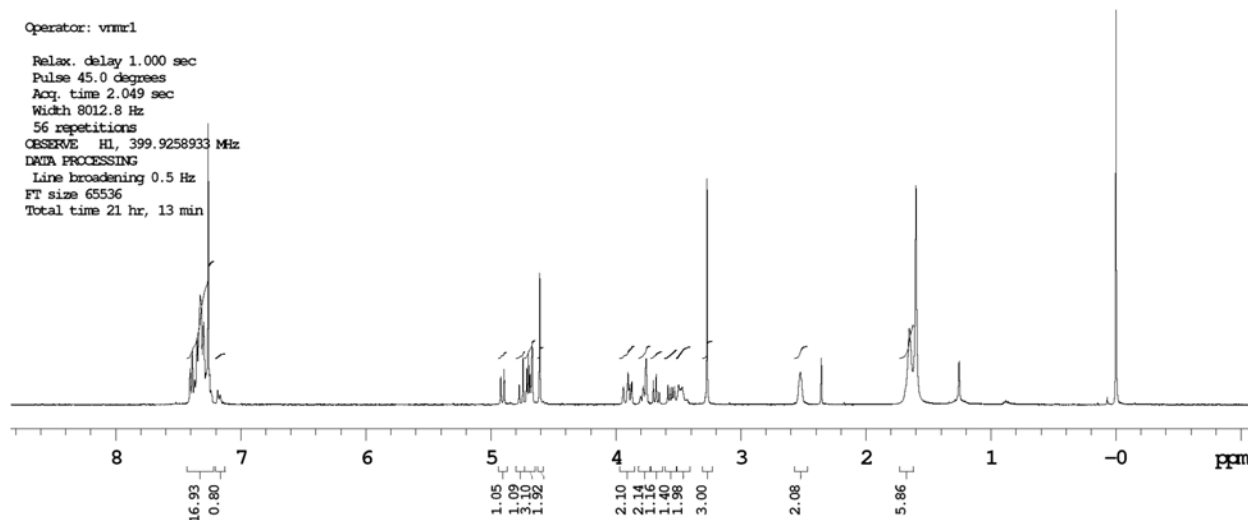

ADV-P-247-178-01  
 C13 EXPERIMENT  
 ADVINUS FUNE

Sample Name:

Data Collected on:  
 DZIRE400-vrms400  
 Archive directory:

Sample directory:

FidFile: ADV-P-247-178-01\_13C..

Pulse Sequence: CARECN (s2pul)  
 Solvent: cdcl3  
 Data collected on: Mar 9 2010

Operator: vmr1

Relax. delay 1.000 sec  
 Pulse 45.0 degrees  
 Acq. time 1.285 sec  
 Width 25510.2 Hz  
 1780 repetitions  
 OBSERVE C13, 100.5609276 MHz  
 DECOUPLE H1, 399.9278781 MHz  
 Power 40 dB  
 continuously on  
 WALTZ-16 modulated  
 DATA PROCESSING  
 Line broadening 1.0 Hz  
 FT size 65536  
 Total time 17 hr, 12 min

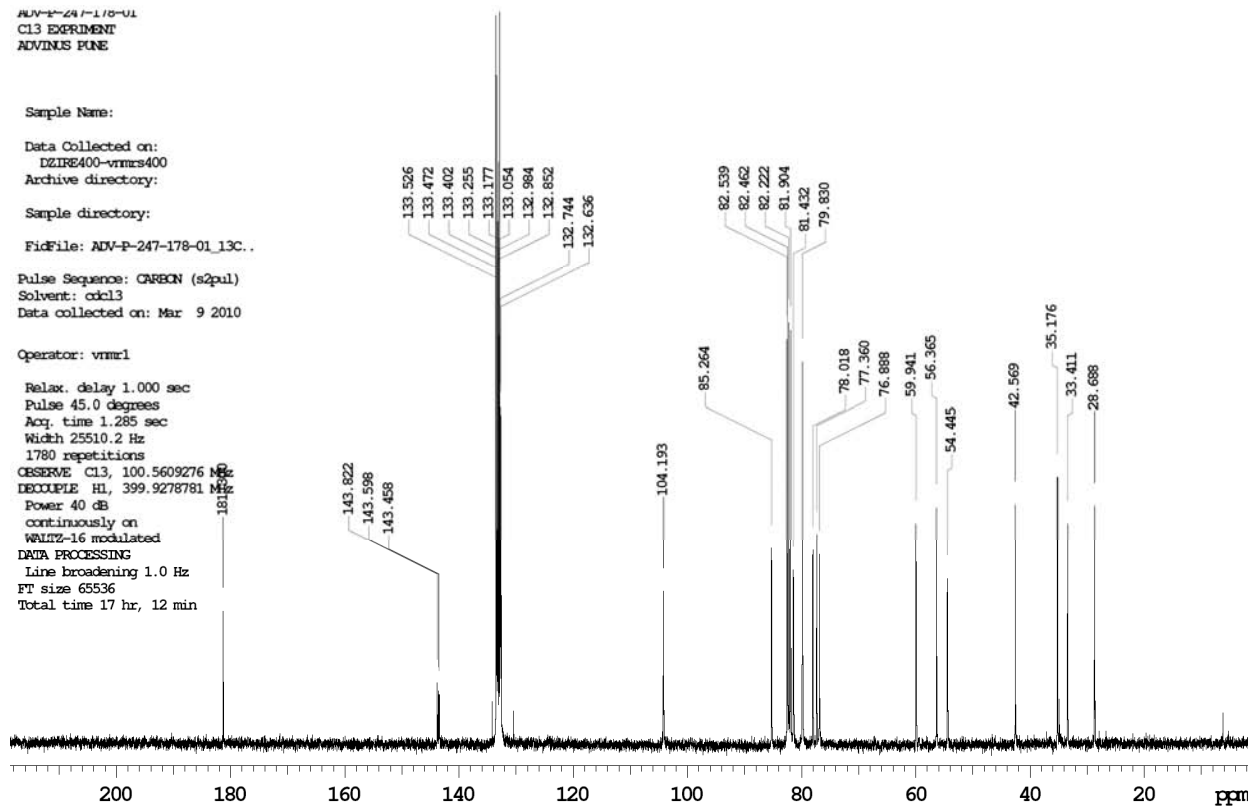

Supplement: c0ob00719f.pdf [file c0ob00719f.pdf]
